# Supplementary material
Source: PubMed Central journal article supplement (PMC5883571)
Supplement: mmc6.pdf [file mmc6.pdf]

# Structural Transitions in Ceramide Cubic Phases during Formation of the Human Skin Barrier

Christian L. Wennberg,<sup>1,2</sup> Ali Narangifard,<sup>2,3</sup> Magnus Lundborg,<sup>2</sup> Lars Norlén,<sup>3,4,\*</sup> and Erik Lindahl<sup>1,5,\*</sup>

<sup>1</sup>Department of Physics, Swedish e-Science Research Center, KTH Royal Institute of Technology, Stockholm, Sweden; <sup>2</sup>ERCO Pharma AB, Science for Life Laboratory, Stockholm, Sweden; <sup>3</sup>Department of Cell and Molecular Biology (CMB), Karolinska Institutet, Stockholm, Sweden; <sup>4</sup>Dermatology Clinic, Karolinska University Hospital, Stockholm, Sweden; and <sup>5</sup>Department of Biophysics and Biochemistry, Science for Life Laboratory, Stockholm University, Solna, Sweden

**ABSTRACT** The stratum corneum is the outermost layer of human skin and the primary barrier toward the environment. The barrier function is maintained by stacked layers of saturated long-chain ceramides, free fatty acids, and cholesterol. This structure is formed through a reorganization of glycosylceramide-based bilayers with cubic-like symmetry into ceramide-based bilayers with stacked lamellar symmetry. The process is accompanied by deglycosylation of glycosylceramides and dehydration of the skin barrier lipid structure. Using coarse-grained molecular dynamics simulation, we show the effects of deglycosylation and dehydration on bilayers of human skin glycosylceramides and ceramides, folded in three dimensions with cubic (gyroid) symmetry. Deglycosylation of glycosylceramides destabilizes the cubic lipid bilayer phase and triggers a cubic-to-lamellar phase transition. Furthermore, subsequent dehydration of the deglycosylated lamellar ceramide system closes the remaining pores between adjacent lipid layers and locally induces a ceramide chain transformation from a hairpin-like to a splayed conformation.

## INTRODUCTION

The main function of skin is to present a barrier between the body and the environment. It prevents water loss from the body and protects against penetration of exogenous substances into the body. The barrier property is located in a lipid structure situated in the intercellular space of the superficial-most layer of the skin, the stratum corneum (1–6). The lipid structure consists of a mixture of saturated long-chain ceramides and free fatty acids together with cholesterol, in an ~1:1:1 molar ratio (7). It is formed via secretion into the intercellular space of glycosylceramide-based bilayers, tightly folded in three dimensions with cubic-like symmetry (unpublished data).

After secretion, the glycosylceramide-based bilayers with cubic-like symmetry are reorganized into ceramide-based stacked lamellae (unpublished data). Concomitantly, the glycosylceramides are deglycosylated (8,9) and dehydrated (10–12). This has led to the suggestions that deglycosylation might facilitate the release of lipid material out of the stratum granulosum cells (13), and that a combined

deglycosylation and dehydration may create a driving force for a cubic-to-lamellar transition of the glycosylceramide-based bilayers (unpublished data). Here, we investigate the effect of glycosylation and hydration upon human glycosylceramide- and ceramide-based bilayers with cubic symmetry, using molecular dynamics (MD) simulation.

The presented MD simulations display a striking difference in behavior between human skin glycosylceramides and ceramides. The simulated systems of human skin glycosylceramides maintain a bilayer structure with cubic symmetry. In contrast, the simulated systems of human skin ceramides are unable to stabilize a bilayer structure with cubic symmetry, and transform into a bilayer structure with stacked lamellar symmetry as the water content is gradually reduced. Deglycosylation of a stable glycosylceramide-based cubic phase triggers a transition into a stacked lamellar phase with remnant connections between adjacent layers. In the ceramide systems, strong interactions between the hydrophobic tails drive the transition into a bilayer structure with stacked lamellar symmetry. In the glycosylceramide systems, the interactions between the glycosylceramide headgroups are stronger, which enable them to maintain the bilayer structure with cubic symmetry. Additionally, based on the simulation models, it appears likely that ceramides may locally cluster together and

Submitted August 29, 2017, and accepted for publication December 28, 2017.

\*Correspondence: [lars.norlen@ki.se](mailto:lars.norlen@ki.se) or [erik.lindahl@dbb.su.se](mailto:erik.lindahl@dbb.su.se)

Lars Norlén and Erik Lindahl contributed equally to this work.

Editor: Andreas Engel.

<https://doi.org/10.1016/j.bpj.2017.12.039>

© 2018 Biophysical Society.

transform from a hairpin to a splayed-chain conformation as the bilayer structure with cubic symmetry relaxes into a bilayer structure with stacked lamellar symmetry.

Taken together, our results support the hypothesis that de-glycosylation and dehydration of the lipid material in the uppermost stratum granulosum facilitate a structural transition that is important for the formation of the human skin barrier.

## METHODS

The sizes of the membrane systems required for this study made an all-atom representation of the ceramides and water unfeasible, since the computational cost would be too high to reach the relevant timescales. Therefore, we decided to use a coarse-grained approach with the MARTINI force field (14), which applies a 4:1 mapping of heavy atoms (carbon, oxygen, nitrogen, and phosphorus; see also Fig. S1) and thereby reduces the model system's total amount of particles roughly by an order of magnitude. Naturally, this will have an effect on the accuracy (in quantitative terms) of the interactions within the simulated systems. However, for qualitative properties such as the difference between models, coarse-grain modeling has the advantage of allowing for direct observation of the actual transitions of the systems not only at the level of individual molecules but also at the mesoscale level of molecular assembly. Further, the rougher interaction landscape used in the MARTINI force field, compared to an all-atom simulation, increases the kinetics of the simulated systems. For water, this usually means that a scaling factor of 4 has to be used to attain correct experimental diffusion rates (14). Herein, although we discuss some kinetic properties in absolute terms, we foremostly consider relative differences between simulations. Due to the time acceleration coupled to coarse graining, we follow the convention set by Marrink and co-workers (14,15) and use a factor of 4 scaling of the raw time coordinate in the simulations.

## Construction of lipid models

The construction of a folded bilayer structure with cubic symmetry is a non-trivial task due to the complex geometry of the system. The literature of previous simulation studies of lipid bilayer structures with cubic symmetry is limited (16–20), and no general method for the construction of these structures is presently available. The cubic membrane structures that we simulated in this study were constructed by first rendering a gyroid isosurface in a cubic unit cell with a side length of 15, 17.5, 20, 22.5, or 25 nm, using the Marching cubes method (22) implemented in the VTK framework (23). For each triangle used in the rendered surface, its area was multiplied by a preset density parameter,  $\lambda$ , resulting in an area parameter,  $\alpha$ , which was used to evaluate the placements of the ceramides at each triangle:

$\alpha < 1$ : No ceramide was placed.

$1 < \alpha < 2$ : A pair of oppositely oriented ceramides in hairpin conformation were placed in the center of the triangle, with their long axes perpendicular to the triangle surface.

$\alpha > 2$ : The triangle was split in half along its longest edge and the new triangles were evaluated separately, using  $\alpha$  as before.

The initial cubic structure constructed for the ceramide (ceramide NS, the most abundant ceramide in human skin (24)) simulation, with cell side length 20 nm, can be seen in Fig. 1 c.

After this, the structures were solvated with water particles in the empty space between the ceramide headgroups (Fig. 1 d), creating systems with  $\sim 11.5$ , 12.5,  $\sim 14.5$ ,  $\sim 18$ , and  $\sim 23$  waters/lipid (using the fact that each MARTINI water corresponds to four water molecules). One of the resulting water structures can be seen in Fig. 1 d. The simulations were performed with the MARTINI force field using the parameters of Sovová

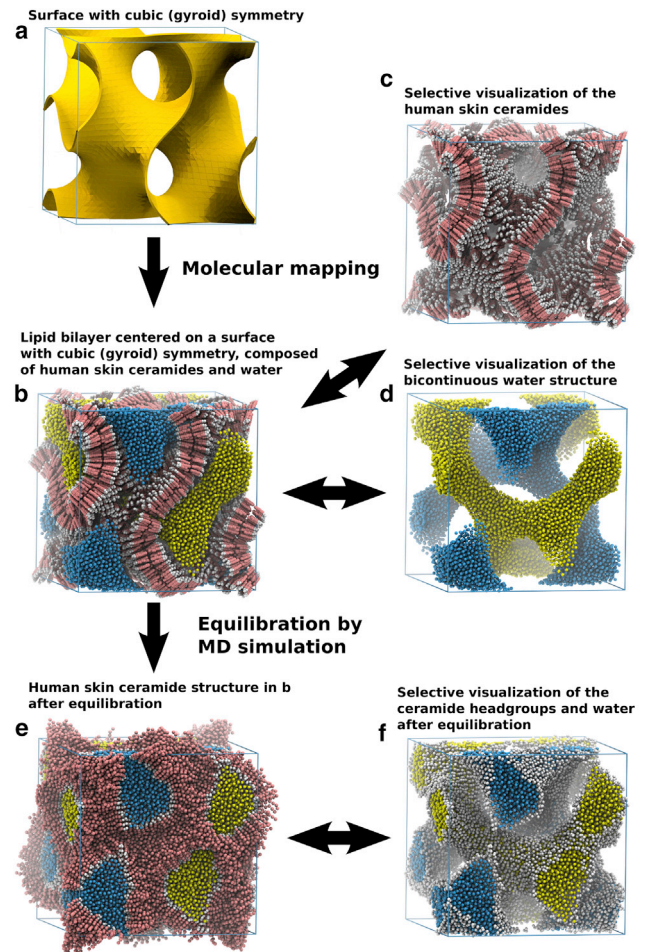

FIGURE 1 Creation of the initial cubic structure in the ceramide simulation. (a) The ceramide starting structures were created by first rendering a periodic gyroid surface in a cubic box (shown here is the surface used in the ceramide simulation with a hydration of  $\sim 14.5$  waters/lipid). (b) The cubic ceramide structure was created by placing ceramide molecules across the gyroid surface, with the ceramide headgroups pointing along the positive and negative surface normals, and thereafter was solvated with water inside the channels. (c and d) Selective visualization of the ceramides (c) and water (d). (e) Before the MD simulations, the starting structure was energy minimized and equilibrated to minimize positional artifacts from the schematic placement of all particles in the system. (f) To make it easier to visualize the structural changes in the system, only particles from the headgroups and water will be shown in most of the images. (cf. Movie S1). To see this figure in color, go online.

et al. (25) for ceramide NS, and the parameters from López et al. (26) for the glycosylceramides. The starting structures (15, 17.5, 20, 22.5, and 25 nm side length) in the ceramide simulations were built using  $\lambda$  equal to 0.026, 0.03, 0.046, 0.039, and 0.04 and contained 2218, 3528, 4664, 5544, and 7726 ceramide molecules, 5374, 9623, 14,863, 22,269, and 38,513 water particles, and 812, 1428, 2208, 3289, and 5722 MARTINI anti-freeze particles. The glycosylceramide simulations were constructed with  $\lambda$  equal to 0.0317, 0.03, 0.045, 0.038, and 0.038 and contained 2086, 3528, 4344, 5104, and 7360 glycosylceramides, 5374, 9626, 13,614, 19,263, and 38,513 water particles, and 812, 1428, 2029, 2879, and 5722 MARTINI anti-freeze particles.  $\lambda$ -values were chosen to maintain a similar hydration between the ceramide and glycosylceramide systems with equal box side length, as well as to maintain an adequate surface density of the ceramides in the respective systems. Furthermore, the

investigated hydration range corresponds to between 26 and 64% water by weight. This compares well with the total water content of the uppermost stratum granulosum cell, which is  $\sim 70\%$  w/w (11), considering that not all water will be present in the cubic lipid structures.

## MD simulations

The starting structures were first energy minimized for 5000 steps using a steepest-descent algorithm. After this, all structures, except those with side length 25 nm, were equilibrated in two steps, first for 80 ns using a time step of 2 fs, and then by an additional 4  $\mu$ s using a time step of 20 fs (the equilibrated structure for the ceramide system with side length 20 nm can be seen in Fig. 1 e). During the equilibration, the waters were restrained to their positions using a force of 1 kJ/mol/nm<sup>2</sup> to maintain the network of water channels in the structure (Fig. 1 d). For the systems with side length 25 nm, restraints on just the water structure were not enough to prevent small ruptures at the ceramide/water interface during the initial equilibration steps, and therefore, these simulations were equilibrated in three steps, first for 80 ns using a time step of 2 fs, where the ceramides were restrained using a force of 5 kJ/mol/nm<sup>2</sup>; then by an additional 80 ns where both the ceramides and waters were restrained using a force of 1 kJ/mol/nm<sup>2</sup>, and finally for an additional 4  $\mu$ s using a time step of 20 fs and the same restraints as for the other systems.

Non-bonded parameters were set according to the updated MARTINI recommendations (27) for simulations with the Verlet cutoff scheme in GROMACS (28,29). During equilibration, the pressure was isotropically maintained at 1 bar with the Berendsen barostat (30) using a coupling constant of 5 ps and a compressibility of  $3.0 \times 10^{-5}$  bar<sup>-1</sup>. The temperature was set to 303 K using separate velocity-rescale thermostats (31) for water and ceramides. After equilibration, the structures were simulated for an additional 40  $\mu$ s with a time step of 20 fs. Pressure was coupled anisotropically to 1 bar using the Parrinello-Rahman barostat (32) with  $\tau = 12$  ps.

After 12  $\mu$ s of simulation, the glycosylceramide structure with a hydration of 14.5 waters per lipid (i.e., the system with side length 20 nm) was transformed into a ceramide structure by a superposition of the three ceramide headgroup particles onto the five headgroup particles of the glycosylceramides. The hydration level was kept constant during this transformation. The resulting structure was first energy minimized for 5000 steps using a steepest-descent algorithm and then equilibrated for 80 ns using a time step of 2 fs, with the waters restrained to their positions using a force constant of 1 kJ/mol/nm<sup>2</sup>. After this the system was simulated for an additional 20  $\mu$ s using the same parameters as described above for the 40- $\mu$ s-long simulations.

After this, a series of simulations were performed in which the water content of the transformed ceramide system and original glycosylceramide system was gradually reduced by randomly removing a number of water molecules corresponding to either 15 or 10% of the water content in the starting systems. Since the overall structure of the glycosylceramide system did not change much after 12  $\mu$ s (the point at which the transformation to a ceramide structure was performed), this structure was also used as a starting point for the water removal. After the random removal of water at each step, the systems were equilibrated for 800 ns with the ceramides/glycosylceramides restrained to their positions using a force constant of 10 kJ/mol/nm<sup>2</sup>. This was then followed by a production run of an additional 4  $\mu$ s. In total, the series of production runs for each system consisted of four iterations in which 15% of the water was removed in each step (60% in total), followed by four additional steps where 10% was removed in each step. For all the other simulated systems, the same water removal procedure was applied starting from their final conformation after 40  $\mu$ s of simulation.

All simulations were performed with GROMACS 5.1.2 (28,29), and the molecular visualizations were created using VMD 1.9.2 (33,34). Fig. 1 a was created using Blender 2.76 (35). The software utilized in the construction of the cubic structures is available at <https://github.com/alinar/>

[cubic\\_membrane](https://github.com/alinar/cubic_membrane), and also requires the Molar package available at <https://github.com/alinar/Molar>.

## Curvature and lipid mobility calculations

To study the geometric properties of the lipid/water surface at a particular frame in the MD simulations, the surface must be extracted from the coordinate and trajectory files. The MDAnalysis toolkit (36,37) was used to access the coordinates in the simulation and the VTK framework (23) was used to implement the three-dimensional space calculations. A scalar field in the form of a voxel grid (size  $32 \times 32 \times 32$ ) was produced with the voxel attributed values equal to the voxel distance to the closest bead of a tail group of any lipid molecule. A cutoff distance of 4.0 Å was chosen to outline the isosurface separating the tail from the head and the water beads. The Marching cubes method (22) was used to extract the mesh of the isosurface from the scalar field, and the surface was smoothed with a Laplacian smoothing filter to obliterate small ripples. The value of the local curvature (mean and Gaussian) was then calculated for the mesh. The “vtkMarchingCubes,” “vtkSmoothPolyDataFilter,” and “vtkCurvature” built-in class methods were used to extract and smooth the surface and to calculate the curvature values.

The lipid mobility in the simulations was calculated as an average of the total three-dimensional displacement of each simulation particle in each ceramide molecule. The average displacement was calculated and stored for each frame in the simulation, and the final mobility was calculated as a moving average over three consecutive frames.

The visualizations of the curvature and lipid mobility were created using VMD 1.9.2 (33,34). The software utilized in the curvature calculations is available at [https://github.com/alinar/cubic\\_membrane](https://github.com/alinar/cubic_membrane), and also requires the Molar package available at <https://github.com/alinar/Molar>.

## Cryo-electron microscopy simulations

The all-atom structures used in the cryo-electron microscopy (cryo-EM) simulations were generated from the glycosylceramide structure with a hydration of 14.5 waters per lipid (i.e., the system with side length 20 nm) after 40  $\mu$ s using the method backward (38), which does a geometric reconstruction of the all-atom structure followed by energy minimization and short equilibration. Simulated images from the generated all-atom structures were created with an EM simulation program developed by Rullgård et al. (39). The software is freely available at <http://tem-simulator.sourceforge.net>. Simulated electron micrographs of the equilibrated molecular dynamics models of the cubic glycosylceramide-based phase (Fig. 6 e), as well as of the pure water solution (Fig. 6 f), were generated at a defocus of  $-1.75$   $\mu$ m, a section thickness of 30 nm, a magnification corresponding to a pixel size of 1.88 Å, and an electron dose of 3,300 eV/nm<sup>2</sup>. For the MD models of the stacked lamellar phase, simulated EM images were generated at a defocus of  $-2.50$   $\mu$ m, a section thickness of 50 nm, a magnification corresponding to a pixel size of 4.35 Å and an electron dose of 13,000 eV/nm<sup>2</sup>.

## RESULTS AND DISCUSSION

The formation of the stacked lamellar structure in the intercellular space of the stratum corneum likely takes place through a cubic-to-lamellar transformation of glycosylceramide-based bilayers with gyroid symmetry (unpublished data). The general form of this lipid structure is that of a bi-continuous water-channel network, separated by a folded lipid bilayer (Fig. 1, b–d). Fig. 1 a shows a surface with cubic (gyroid) symmetry, which was used as a template for constructing the simulated ceramide structures in this work. A completed ceramide structure can be seen in

Fig. 1 *b*, together with selective visualizations of either the ceramide bilayer structure (Fig. 1 *c*) or the bicontinuous water structure (Fig. 1 *d*). Finally, the ceramide/water structure after an initial 4  $\mu\text{s}$  equilibration by MD simulation can be seen in Fig. 1 *e*, and a selective visualization of the ceramide headgroups and water channels can be seen in Fig. 1 *f*.

Due to the relatively complex geometry of lipid bilayer structures with cubic symmetry, the structural changes within the simulated systems are difficult to visualize using a space-filling model for all particles, which is evident from Movie S1 or by comparison of Fig. 1, *e* and *f*. Therefore, the majority of the images (and videos) discussed from here on only show the simulation particles that represent water together with the simulation particles that represent the glycosylceramide- or ceramide headgroup regions (more details about the particle representation, as well as the colorization utilized online, are available in the Supporting Material).

### Selection of simulated models

Due to the hydration-dependent behavior of lipid cubic phases, and the fact that the utilized MARTINI models are parametrized to reproduce properties of a flat lipid bilayer rather than a folded cubic bilayer phase, the choice of a suitable system configuration is a non-trivial task. We constructed five different models of ceramide and glycosylceramide systems with hydration levels between 11.5 and 23

waters per lipid, corresponding to simulation box sizes with a side length between 15 and 25 nm, and each system was initially simulated for 40  $\mu\text{s}$  (Fig. 2; Figs S3–S6). As the aim of this study was to study the effect of deglycosylation on cubic ceramide systems with gyroid symmetry, the systems with a hydration level of  $\sim 11.5$  (Fig. S3) and  $\sim 23$  (Fig. S6) waters per lipid were given less emphasis during the analysis. The ceramide and glycosylceramide systems simulated at a hydration of  $\sim 11.5$  waters per lipid both quickly transitioned into a cubic inverted micellar phase, which might be an interesting entry point for future work but further analysis of which is beyond the scope of this study. Furthermore, an inverted micellar phase with cubic symmetry gives a cryo-EM pattern that is absent at the interface between stratum corneum and stratum granulosum (unpublished data). The ceramide and glycosylceramide systems with a hydration of  $\sim 23$  waters per lipid both transitioned into stacked lamellar structures, a behavior we believe to be an indication of an oversaturation of water in the systems that likely prevents the formation of a stable cubic phase.

For the other three simulated system compositions, with hydration levels of 12.5,  $\sim 14.5$ , and  $\sim 18$  waters per lipid (Fig. 2; Figs S4 and S5), a similar behavior was observed for systems with the same lipid (ceramide or glycosylceramide), but a distinct difference was observed when comparing the ceramide systems with the corresponding (same hydration level) glycosylceramide systems.

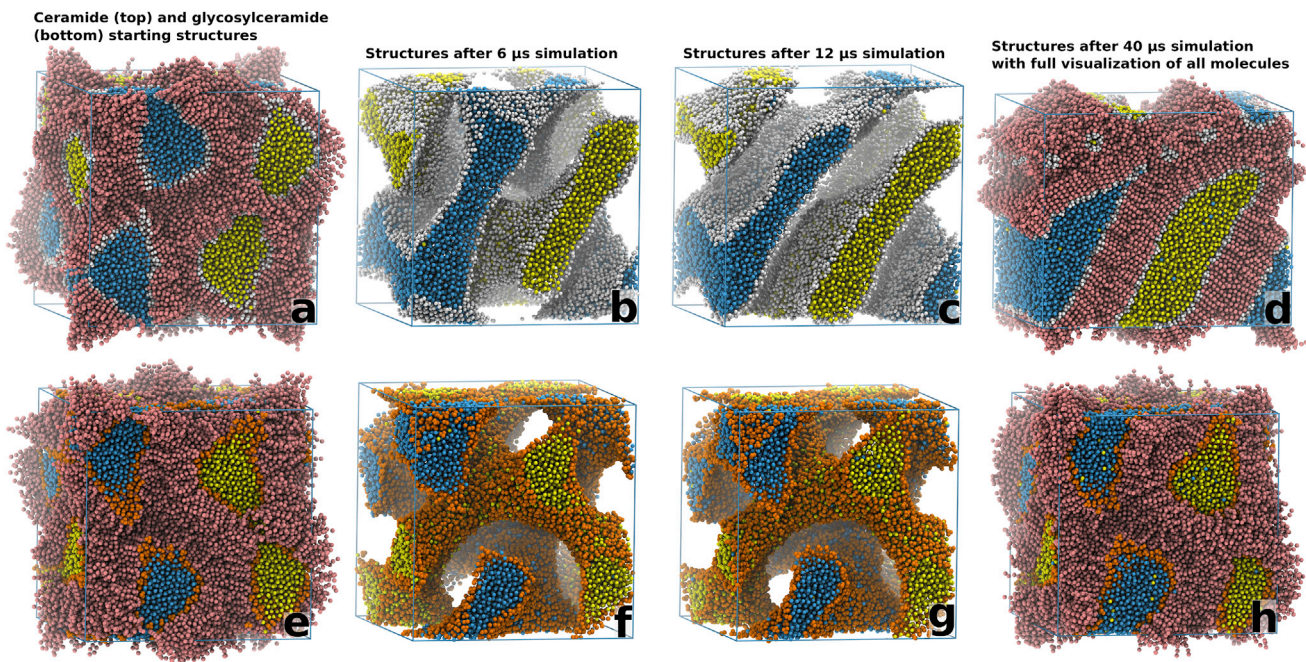

FIGURE 2 Snapshots of the cubic structures with a hydration of  $\sim 14.5$  waters/lipid after 0, 6, 12, and 40  $\mu\text{s}$  of simulation time. In the ceramide system (*a–d*), there is a large structural rearrangement with a complete disconnection of two water channels. There is an overall rearrangement of the original gyroid bilayer structure into a structure resembling a lamellar bilayer. In the glycosylceramide system (*e–h*), the gyroid geometry is maintained throughout the simulation. The starting (*a* and *e*) and final structures (*d* and *h*) are displayed using a full representation of all simulation particles. (cf. Movies S1 and S3). To see this figure in color, go online.

Due to the similar behavior of the systems with hydration levels of 12.5,  $\sim 14.5$ , and  $\sim 18$  waters per lipid, most of the next sections will focus on the systems (ceramide or glycosylceramide) with a hydration level of  $\sim 14.5$  waters per lipid as a discussion point, although data from the other systems will also be presented wherever suitable. In the next section, we first discuss the initial 40  $\mu\text{s}$  simulations of the cubic glycosylceramide and ceramide lipid bilayer structures, and the effect of glycosylated headgroups on the stability of a ceramide cubic phase. Thereafter, we discuss the effect of dehydration, and finally compare some of the obtained lipid structures with experimental cryo-EM data from human skin.

We have tried to select appropriate snapshots from the simulations to display the events we discuss in the text. However, we strongly encourage the reader to utilize [Movies S1](#), [S2](#), [S3](#), and [S4](#), since some structural details are difficult to convey in two-dimensional images.

### Human skin glycosylceramides stabilize a folded bilayer structure with cubic-like symmetry

The evolution of the initial ceramide system ( $\sim 14.5$  waters per lipid) during the first 12  $\mu\text{s}$  of simulation time can be seen in [Movie S1](#), and snapshots of the system after 0, 6, 12, and 40  $\mu\text{s}$  can be seen in [Fig. 2, a–d](#). During this time the system gradually changes from its original cubic sym-

metry ([Fig. 2 a](#)) into a structure similar to stacked bilayers separated by water ([Fig. 2, c–d](#)). This transition includes a complete disconnection of two of the water channels, with the intermediate structures displayed in [Fig. 2, a–c](#) resembling the inverse of the lamellar-to-cubic phase transition described by Tang and co-workers ([Fig. 5 in \(40\)](#)). This conformational change appears to be driven by the hydrophobic interactions in the system, as the structural rearrangements (from [Fig. 2, a–d](#)) lead to a tighter packing of the ceramide hydrocarbon chains and thus the formation of a gel-state phase. This strong propensity of the ceramides to adopt a gel phase destabilizes the cubic phase, and drives the system toward a lamellar geometry. [Movie S2](#) displays this effect during the disconnection of one of the channels in [Fig. 2, a–d](#), and four snapshots from the full simulation are displayed in [Fig. 3](#) together with the total potential energy in the simulated system (*black curve*) and the average interaction energy for the fully visualized ceramides (*thin curve*). The favorable interaction energies coupled to the tighter packing of the ceramide tails can be seen from the interaction energy for the visualized ceramides ([Fig. 3 e](#)) as the structure transforms from the cubic phase, with fluid hydrocarbon tails, into the gel-state lamellar phase at the end of the simulation. The combined conformational changes in the whole system drive the locally situated ceramides, visualized in [Fig. 3, a–d](#), toward less favorable ceramide-ceramide interactions ([Fig. 3 e, thin curve](#)) as

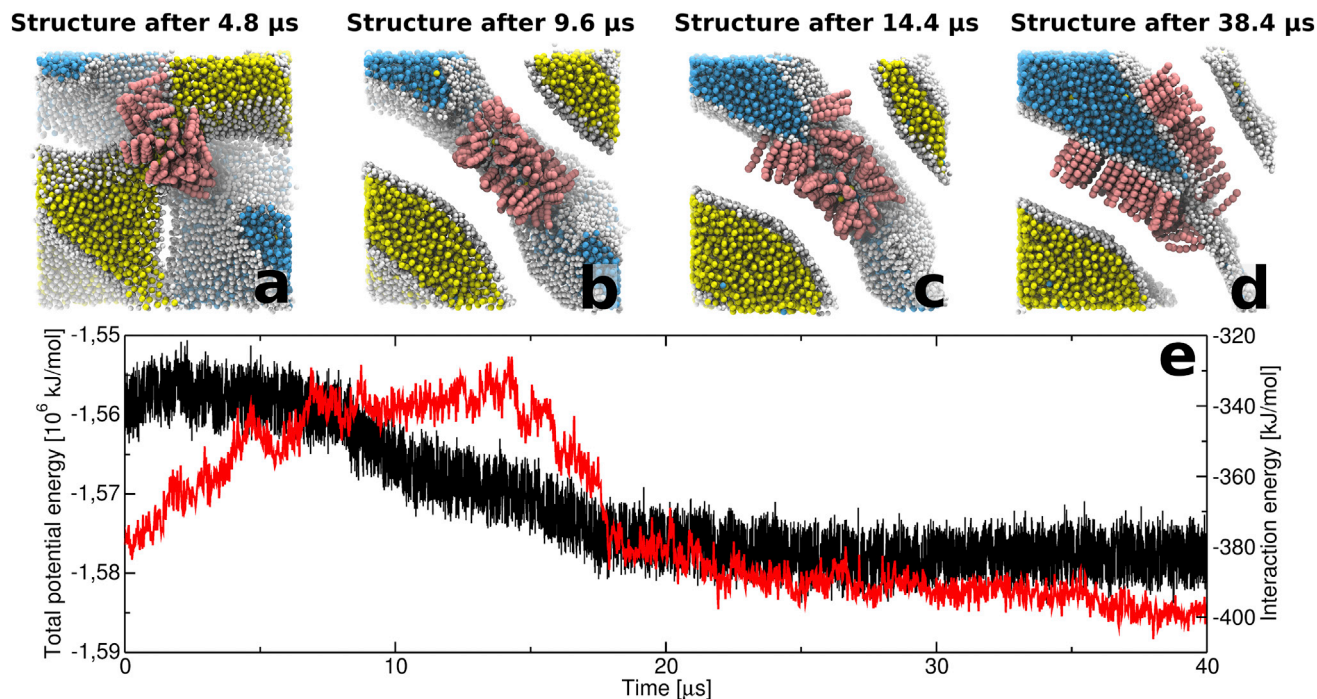

**FIGURE 3** Full disconnection of one water channel in the ceramide structure in [Fig. 2](#) over 40  $\mu\text{s}$  of simulation. The structural changes within the ceramide system lead to a gradual decrease of the diameter of the original water channel ([a](#)) as the simulation progresses. ([b](#)) The channel disconnects completely after  $\sim 6$   $\mu\text{s}$ , and leaves a disordered structure of ceramides, and a few waters, behind. ([c](#) and [d](#)) Eventually, the disordered ceramides arrange into a bilayer structure. ([e](#)) The total potential energy in the system is shown in black, and the interaction energy for the visualized ceramides (calculated as a per-molecule average) is shown in thin. (cf. [Movie S2](#).) To see this figure in color, go online.

the diameter of the water channel (Fig. 3 *a*) gradually decreases. After 6  $\mu\text{s}$  the water structure becomes divided into two separate entities, with the space previously occupied by the water channel now filled by disordered ceramides (Fig. 3 *b*). After this, the disordered region gradually shrinks as its ceramides integrate into the surrounding bilayer structure. For a majority of the visualized ceramides this happens between 14 and 18  $\mu\text{s}$  (Fig. 3, *c* and *d*, respectively), simultaneous with the formation of a larger gel-state region in the ceramide structure that can be observed through the shift in the total potential energy of the system (*black curve* at  $\sim 15 \mu\text{s}$ ). At the end of the simulation, the local geometry of the region originally occupied by a water channel has changed into a lamellar structure with ordered ceramides in the gel state (Fig. 3 *d*).

For the simulated glycosylceramide system (hydration  $\sim 14.5$  waters/lipid), the evolution during the first 12  $\mu\text{s}$  can be seen in [Movie S3](#), and snapshots taken after 0, 6, 12, and 40  $\mu\text{s}$  can be seen in Fig. 2, *e-h*. In contrast to the ceramide system, the glycosylceramide system maintains the cubic lipid bilayer phase throughout the duration of the 40  $\mu\text{s}$  simulation despite the propensity for glycosylceramides to form bilayers in the gel state at the simulated temperature (303 K) (26). The formation of these gel-state bilayer structures is, as for the ceramide system, driven by the increased amount of favorable interactions coupled to the tight packing of the hydrocarbon chains. In the glycosylceramide system, the gel-state-driven disconnection of water channels, as observed in the ceramide system, appears to be prevented, and the overall cubic-like structure is main-

tained throughout the simulation, although local formations of gel-state bilayers can be observed in the cubic structure. One explanation for this behavior might be the stronger interactions between the glycosylceramide headgroups (displayed as a fraction relative to the tail region interactions for all simulated systems in Fig. S2). To further test this hypothesis, the glycosylceramide system was chemically transformed into a ceramide system by an exchange of the headgroup particles of the glycosylceramide structure after 12  $\mu\text{s}$  simulation (Fig. 4, *b* and *c*). The transformed ceramide structure was then simulated for 20  $\mu\text{s}$  (Fig. 4, *b-e*) during which it displayed a structural transformation into a lamellar structure similar to the original ceramide system (cf. Fig. 2 *d*).

The results from Fig. 2 together with those from the deglycosylated ceramide system indicate that to maintain a cubic-like structure, the interactions between the headgroups need to be strong enough to counteract the hydrophobic interactions in the hydrocarbon chain regions that locally drive the systems toward the gel state. This suggests that glycosylceramides are critical for the stabilization of folded bilayers with cubic-like symmetry in human skin.

Furthermore, using the analysis tools available in the GROMACS simulation package (28,29), we calculated the water diffusion coefficient during the first and last 4  $\mu\text{s}$  of the simulation time in all systems (Table S1). Diffusion coefficients are calculated using a linear fit through the mean-square displacement of the water particles in the simulations. The error estimates are obtained as the difference

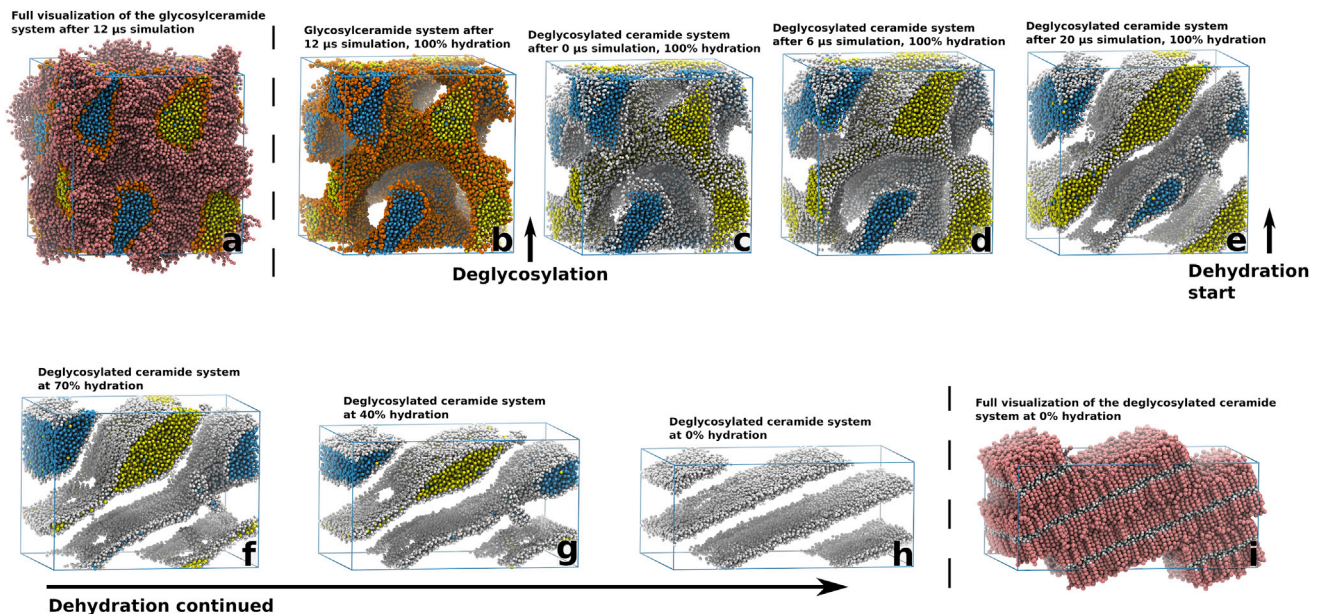

FIGURE 4 The combined simulations of the cubic-to-lamellar phase transition. The simulated glycosylceramide structure (with a hydration of  $\sim 14.5$  waters/lipid) (*a*) was alchemically transformed into a ceramide structure (*b* and *c*) by exchanging its headgroup particles after 12  $\mu\text{s}$  of simulation. Although the original glycosylceramide structure retained its cubic geometry over an additional 28  $\mu\text{s}$ , the transformed ceramide structure displayed a cubic-to-lamellar transition (*c-e*) during the first 20  $\mu\text{s}$  after the transformation, indicating the importance of the headgroup interactions for the stability of the cubic phase. Dehydration of the ceramide system (*f-h*) resulted in a fully lamellar structure (*i*). The simulation box is outlined in blue. To see this figure in color, go online.

between diffusion coefficients calculated from the first and second halves of the fitting intervals. For the systems with low hydration ( $\sim 11.5$  waters/lipid), the quick transition to an inverted micellar phase greatly reduces the diffusion of water in these systems, resulting in diffusion coefficients an order of magnitude below those of the other systems.

The other, more hydrated systems all display an increase in the diffusion coefficient for water with increasing system size. This is most likely attributed to the increased volume of water inside the channels as well as to the reduced friction experienced from water interacting with the lipid head-groups. The diffusion coefficient in the ceramide system with a hydration of 23 waters/lipid ( $0.4393 \times 10^{-5} \text{ cm}^2/\text{s}$ ) is not far off from the self-diffusion of coarse-grained water, which has been calculated to  $0.5 \times 10^{-5} \text{ cm}^2/\text{s}$  (15), at 300 K. For the simulations with a gyroid cubic symmetry, we otherwise see a reduction of the diffusion by a factor of  $\sim 1.5$ – $2$  compared to self-diffusion in bulk conditions. This agrees qualitatively well with a previous study (20) where the water diffusion coefficient in a diamond cubic phase was reduced by a factor of 3.

Additionally, the glycosylceramide systems all display a lower diffusion coefficient (compared to the ceramide systems) during the first  $4 \mu\text{s}$  where all the systems have a cubic geometry. This might be due to the more hydrophilic head-groups of the glycosylceramides, which increase the friction experienced by the water in the channels. During skin barrier formation, this effect might facilitate water evacuation from the ceramide-based folded bilayer structure with cubic-like symmetry during its transition into a non-water-containing stacked lamellar structure.

On a more mesoscopic scale, we can also look at the molecular mobility of each ceramide (calculated from the displacement of each atom in each ceramide, averaged in a 72 ns moving window from the simulation), and correlate that molecular mobility to the local mean and Gaussian curvatures at the ceramide/water interface. In Figs. S12 and S13, we show this for the systems with a hydration of  $\sim 14.5$  waters/lipid. During the first  $12 \mu\text{s}$  in the ceramide system, we see a local increase of the molecular mobility (*red* intensity level) and the mean curvature (*green* intensity level) in the regions adjacent to the disconnected water channels and a decrease in the Gaussian curvature (*yellow* intensity level) in the flattened stacked lamellar regions. Accordingly, those regions that have transitioned into a lamellar structure are characterized by low molecular movement and low mean and Gaussian curvatures (Fig. S12). By contrast, in the glycosylceramide system, where there is no disconnection of the water channels and the cubic geometry is maintained throughout the simulation, the lipid mobilities (like the local mean and Gaussian curvatures) appear to be homogeneously distributed across the whole structure (Fig. S13). Furthermore, the relatively low mobility of the lipids in the simulation

(average displacement of  $\sim 5$ – $7 \text{ \AA}$  over the 72 ns window in Figs. S12 and S13) should limit the effect of any potential artificial lipid movement coupled to the use of periodic boundary conditions.

### As water content is reduced, the human skin ceramide folded bilayer structure transforms into a stacked lamellar structure

Although it is theoretically possible to perform simulations in grand canonical ensembles to gradually reduce the concentration of a molecule, this is not supported in normal simulation programs. Instead, the structure from the deglycosylated ceramide system in Fig. 4, *c–e*, had its water content reduced in a step-wise series of  $4\text{-}\mu\text{s}$ -long simulations. The water was reduced in four steps of 15% (relative to the starting structure) followed by four steps of 10% (relative to the starting structure), until there was no water left in the systems. Comparatively small structural transformations were observed upon the step-wise water removal in the ceramide system (displayed in Movie S4), compared to the larger structural transformations observed during the first  $20 \mu\text{s}$  of simulation (Fig. 4, *c–e*). Due to this, we believe that the stepwise reduction in water content is able to reproduce the different behaviors of the ceramide system adequately. Movie S4 displays the combined trajectories from all simulations in the dehydration series of the ceramide system. Fig. 5 shows the ceramide structure after the simulations at the steps with 100, 70, 40, 20, and 0% water remaining from the starting structure.

Going through the steps in the series of dehydration simulations (Fig. 5, *a–e*), the ceramide structure transitions into a stacked lamellar bilayer structure (Fig. 5 *f*). During this transition some parts of the structure remain distorted, with the locally disordered ceramide chains oriented approximately parallel to the surrounding bilayer structure (e.g., Fig. S14 *a*), and these irregularities seem to stem from the large local conformational changes that occur during the closure and disconnection of the water channels in the simulation of the starting structure (Fig. 2, *a–d*). Almost all of these distorted regions eventually disappear, and only a few persist at the end of the dehydration series (Movie S4).

One interesting observation from these distorted regions is that the ceramides tend to cluster together in the splayed-chain conformation, orienting their oppositely directed sphingoid and fatty acid moieties along the bilayer normal in a seemingly alternating fashion, as the system relaxes into a non-water-containing stacked lamellar structure (Fig. S14 *b*). Speculatively, this finding could be of relevance for the formation of the stacked lamellar bilayer structure based on splayed ceramides present in the stratum corneum intercellular space (unpublished data; 10).

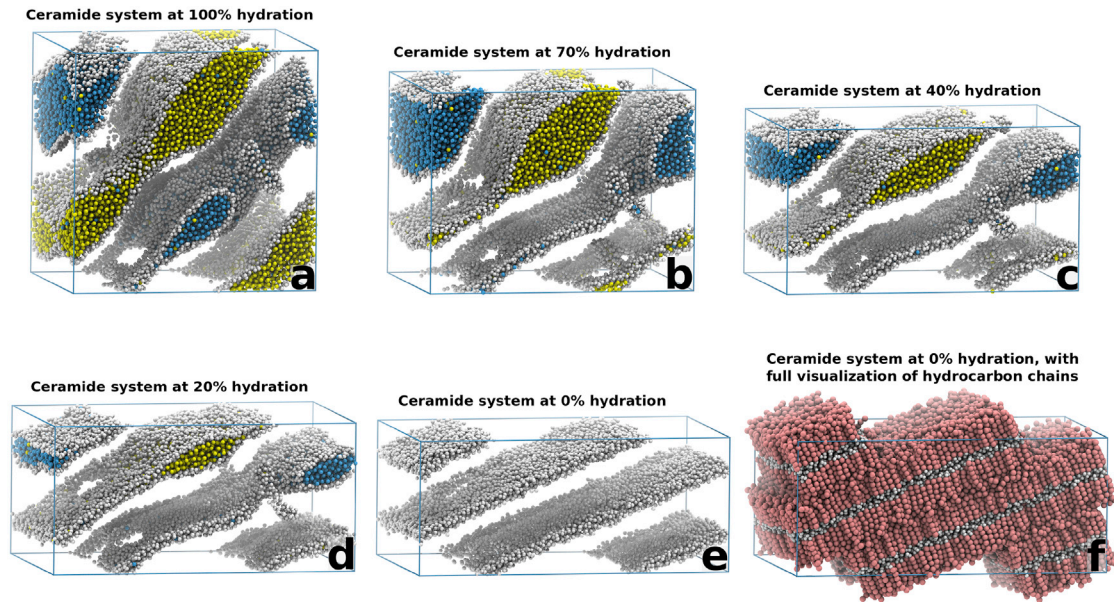

FIGURE 5 The final structures of the ceramide system with an original hydration of  $\sim 14.5$  waters per lipid, at a water content (compared to the original system) of 100, 70, 40, 20, and 0% (a–f). As water is removed from the system, a transition into a fully lamellar structure is observed. Some areas with disordered ceramides can be seen as holes in the headgroup structure, but the majority of these areas eventually relax into the same bilayer conformation as the surrounding ceramides. The full representation of the 0% water system (f) clearly demonstrates the final lamellar structure. The simulation box is outlined in blue (cf. [Movie S4](#)). To see this figure in color, go online.

In addition to the ceramide system in [Fig. 4, c–e](#), we also performed the same dehydration procedure with the corresponding glycosylceramide system, starting from the structure after  $12 \mu\text{s}$  ([Fig. 2 g](#)), and the results can be seen in [Fig. S7](#). The glycosylceramide system retains the cubic-like structure as the water content is reduced, with its original bi-continuous structure being conserved throughout the simulation series. At greatly reduced water contents (0% water content in [Fig. S7 e](#)), there are some local lamellar bilayer structures present (as shown in [Fig. S7 f](#)), but the overall architecture of the final dehydrated system is still far from lamellar ([Fig. S7 e](#)).

Furthermore, the systems simulated at other hydration levels were subjected to the same water removal procedure, starting from their structure after the initial  $40 \mu\text{s}$  simulation, and snapshots from these simulations at 70, 40, and 0% hydration can be seen in [Figs. S8–S11](#). Starting with the systems with a hydration of 12.5 ([Fig. S9](#)) or  $\sim 18$  ([Fig. S10](#)) waters/lipid, the structure in the respective ceramide simulations at 0% hydration resembles that of a stacked lamellar lipid bilayer, whereas the glycosylceramide simulations appear to preserve the gyroid network present in the original system. There are some irregularities in the bilayer structure displayed in [Fig. S9 c](#) (visualization of the whole structure displays two bilayer formations situated at an angle against each other), but it still follows the same pattern as observed in the previously discussed simulation, with a clear transition toward a lamellar organization for the ceramide system. For the glycosylceramide systems, there is a tendency toward a lamellar structure for the system with a hydration of  $\sim 18$  waters per lipid ([Fig. S10 f](#)), although remnants of the old chan-

nel structure are still present in the same way as for the system in [Fig. S7 e](#). The system with a hydration level of 12.5 waters/lipid displays a clearly non-lamellar structure ([Fig. S9 f](#)). Additionally, splayed-chain ceramides similar to those in [Fig. S14](#) also appear in the simulated ceramide systems with  $\sim 12.5$  and  $\sim 18$  waters/lipid.

In the simulations with a starting hydration of  $\sim 11.5$  waters/lipid ([Fig. S8](#)), the ceramide system displayed no cubic-to-lamellar phase transition, and the final system instead contained a disorganized mixture of ceramides with no apparent structure. The final conformation of the corresponding glycosylceramide structure once again preserves the channel structure, as observed in the other glycosylceramide simulations ([Figs. S7, S9, and S10](#)).

For the highly hydrated systems ([Fig. S11](#)) there is a transition into a stacked lamellar structure observed in both simulations, although the glycosylceramide systems still contain remnants of the old channel structure, similar to [Fig. S10 f](#). These results, taken together with the results from the starting simulations ([Fig. 2; Figs. S3–S6](#)), strengthens the notion that the glycosylceramides are able to stabilize a three-dimensional folded bilayer structure with gyroid cubic symmetry, whereas gyroid cubic ceramide structures appear to transition into stacked lamellar bilayers. Unless they were highly hydrated, glycosylceramide systems displayed no transition into a stacked lamellar system. A deglycosylation of the glycosylceramide headgroups reduces the inter-headgroup interaction strength ([Fig. S2](#)) and ultimately leads to a loss of the cubic symmetry in a previously stable glycosylceramide system ([Fig. 4, b–e](#)). A dehydration of the deglycosylated



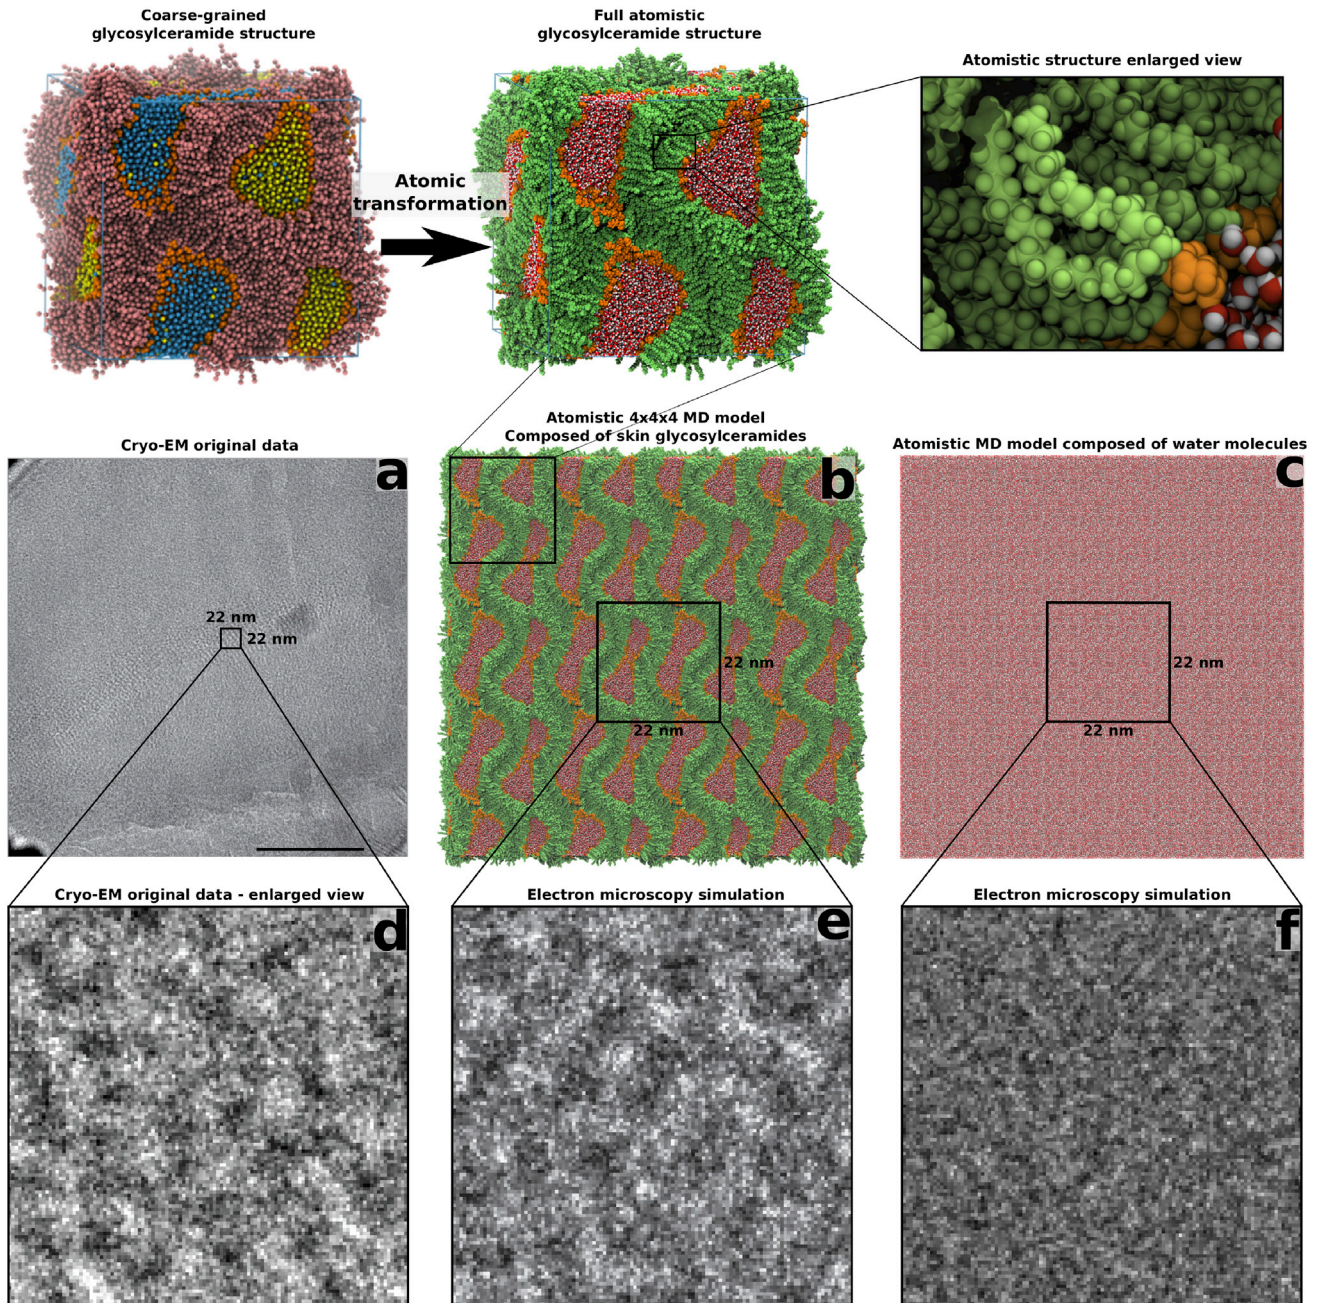

FIGURE 6 Transformation of a coarse-grained cubic-phase glycosylceramide structure into an all-atom structure enables comparison to original cryo-EM data. The glycosylceramide structure with a hydration of  $\sim 14.5$  waters/lipid was transformed into an all-atom structure (*top*). To compare to experimental cryo-EM data (*a*), the unit cell of the all-atom structure was extended in three dimensions (*b*) and subjected to a cryo-EM simulation. Features from selected parts of experimental cryo-EM images (*d*) can then be compared to features present in the simulated cryo-EM images (*e*), or toward a negative control such as water (*c* and *f*). (*a* and *d*) adapted from Norlén, unpublished data, with permission. To see this figure in color, go online.

ceramide structure promotes a full transition into a stacked lamellar structure (Fig. 4, *f-h*).

### Molecular transformation to all-atom structures enables validation against cryo-EM data

The size of the structures studied in this work required us to utilize a coarse-grained approach to be able to reach

the timescales relevant for the structural transitions that occurred during the simulations. Validation of the simulated models against experimental data from human skin is thus a non-trivial task. In previous publications, we presented a methodology (10) that utilizes simulated cryo-EM images to identify molecular models yielding patterns compatible with cryo-EM patterns observed in human skin. A natural extension of this method would

be to utilize the thermodynamically equilibrated structures obtained from MD simulations as input structures for EM simulation. However, since EM simulations require structures with an all-atom representation, to get the correct electron density distributions, the simulated structures presented in this work first have to be transformed into all-atom structures (38). This methodology is described in Figs. 6 and 7, which show the simulated cryo-EM images from the MD-simulated cubic (hydration  $\sim 14.5$  waters/lipid) and corresponding lamellar structure after deglycosylation and dehydration, respectively.

The coarse-grained-to-all-atom transformation of the glycosylceramide structure after 40  $\mu$ s of simulation is shown at the top of Fig. 6, and the corresponding transformation of the final lamellar structure at the top of Fig. 7. After transformation, the all-atom unit cell is replicated in three dimensions (Figs. 6 *b* and 7 *b*) to reduce possible edge effects in the EM simulation, and the resulting simulated image (Figs. 6 *e* and 7 *d*) can then be compared with the original cryo-EM data (Figs. 6 *d* and 7 *c*).

Despite the simplified models used in this work (only one ceramide or glycosylceramide component, no cholesterol, and no free fatty acids), the simulated cryo-EM images of

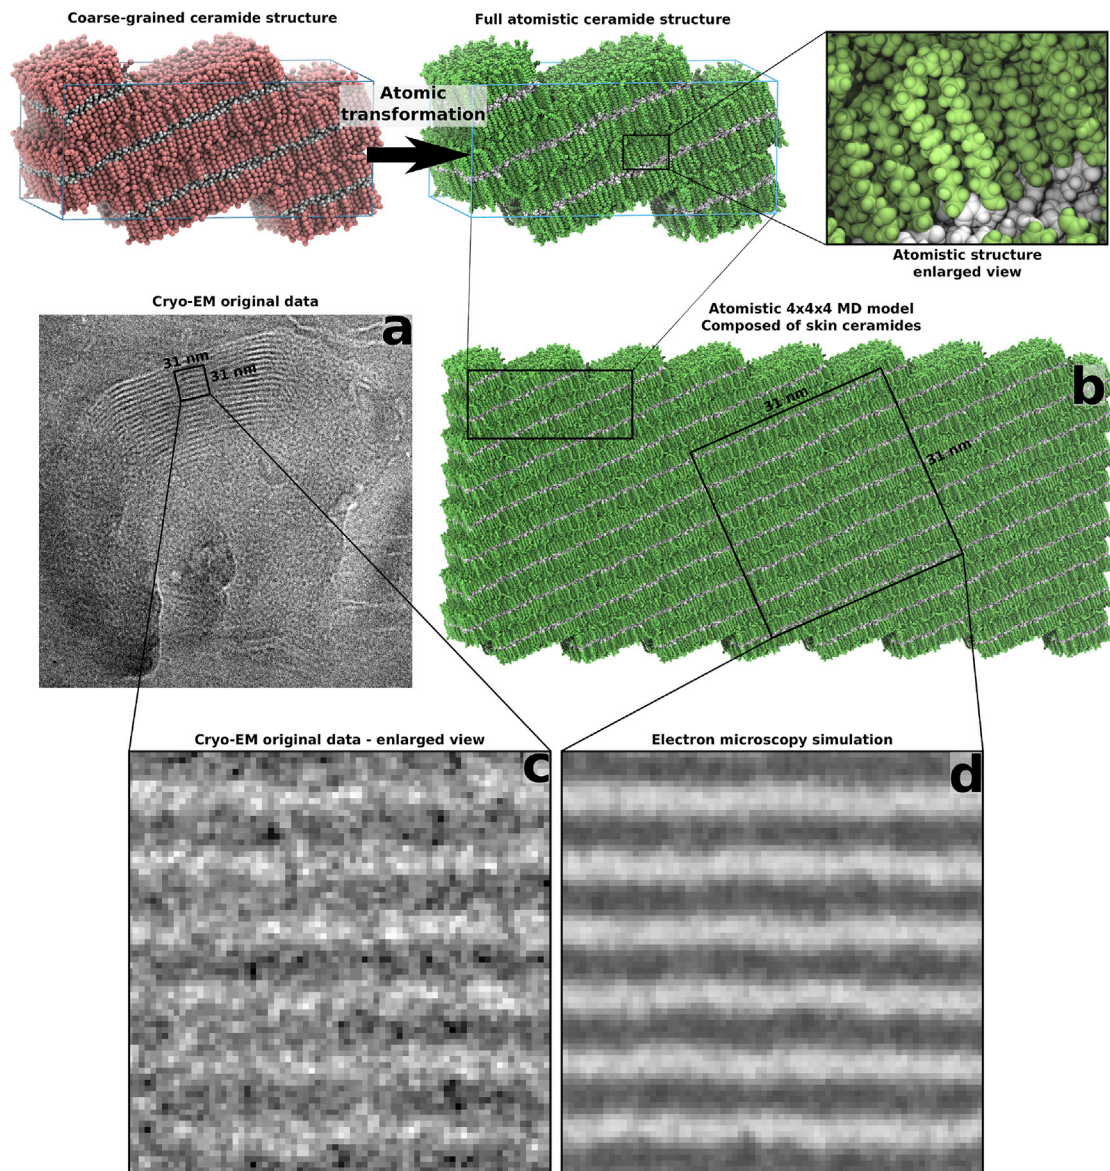

FIGURE 7 Transformation of a lamellar coarse-grained ceramide structure into an all-atom structure enables comparison to the original cryo-EM data. The lamellar ceramide structure with a hydration of  $\sim 14.5$  waters per lipid (Fig. 4 *f*) was transformed into an all-atom structure (*top*). To compare to experimental cryo-EM data (*a*), the unit cell of the all-atom structure was extended in three dimensions (*b*) and subjected to a cryo-EM simulation. Features from selected parts of the experimental cryo-EM images (*c*) can then be compared to features present in the simulated cryo-EM images (*d*). Images (*a*) and (*c*) are adapted from Norlén, unpublished data, with permission. To see this figure in color, go online.

the cubic phase (Figs. 6 e) compare favorably with the granular pattern obtained from the continuous membrane region of the topmost stratum granulosum cell (Norlén, unpublished data, with permission.) (Fig. 6 a). As a negative control, an EM simulation image of a pure water solution obtained under the same conditions is shown in Fig. 6 f. Likewise, simulated electron micrographs of the dehydrated stacked lamellar structure (Fig. 7 d) correspond closely with the lamellar cryo-EM patterns found in skin (Fig. 7 c).

## CONCLUSIONS

Skin barrier formation likely takes place through a cubic-to-lamellar lipid transition (unpublished data). Through this process, a three-dimensionally folded cubic-like lipid bilayer structure transforms into a stacked lamellar structure at the interface between the stratum granulosum and stratum corneum. A change in lipid composition, from being dominated by glycosylceramides (41–43) in the stratum granulosum to becoming completely replaced by ceramides (8,9,41,42,44,45) in the stratum corneum, has been suggested as the driving force for this cubic-to-lamellar transition (unpublished data; 10).

The MD simulations provided here cast, to our knowledge, new light on the molecular properties of these processes and indicate that glycosylceramides are able to stabilize a cubic-like bilayer structure. Furthermore, simulations of ceramides lead to a collapse into a stacked lamellar structure. The main driving force seems to be the hydrophobic interactions between the ceramides, which at the simulated temperature form bilayers in the gel state. The stronger interactions between the glycosylceramide headgroups enable them to maintain the cubic-like bilayer geometry in the glycosylceramide system, whereas interactions between the hydrophobic tails are the main cause of the structural changes in ceramides. These observations suggest that glycosylceramides are important for the stability of the cubic-like lipid bilayer structure present in the stratum granulosum, and that  $\beta$ -glucocerebrosidase-mediated cleavage of their sugar moieties might be important for its collapse into the stacked lamellar structure present in the stratum corneum (unpublished data; 10).

A more realistic model of skin barrier formation should account for the complex mixture of ceramides, free fatty acids, and cholesterol that is present at the stratum-granulosum-stratum-corneum interface. However, the simplified models studied here, based on pure skin ceramides and glycosylceramides, reveal striking differences in the simulated properties between the two systems that are in agreement with available experimental human skin data. The simplified models may thus provide mechanistic insight into the basic features of skin barrier formation at the molecular level.

Furthermore, we show that a molecular transformation of simulated coarse-grained structures into their all-atom counterparts enables us to obtain simulated EM images of

the equilibrated structures. The simulated electron microscopy data obtained from the MD models can then be compared to the original cryo-EM data from native skin to validate the structural information obtained from the MD simulations. This approach presents, to our knowledge, a novel way of obtaining structural information from biological tissues through the combination of cryo-EM, MD simulation, and electron microscopy simulation.

## SUPPORTING MATERIAL

Fourteen figures, one table, and four movies are available at [http://www.biophysj.org/biophysj/supplemental/S0006-3495\(18\)30060-2](http://www.biophysj.org/biophysj/supplemental/S0006-3495(18)30060-2).

## AUTHOR CONTRIBUTIONS

The starting structures were created by C.L.W., A.N., and M.L.. The MD-simulations and analysis were performed by C.L.W. The cryo-EM simulations were performed by A.N., who also helped with the analysis, together with M.L. The study was designed and written by, C.L.W., L.N., and E.L. C.L.W., A.N., M.L., and L.N. have stock options in ERCO Pharma AB. C.L.W., A.N., and M.L. are employed by ERCO Pharma AB.

## ACKNOWLEDGMENTS

The MD simulations were performed on resources provided by the Swedish National Infrastructure for Computing (SNIC) at PDC Centre for High Performance Computing.

ERCO Pharma AB, The Welander Foundation, Svenska läkaresällskapet, Oriflame, Shiseido Japan, LEO Pharma, the Wenner-Gren Foundation, and Vetenskapsrådet are acknowledged for generous financial support.

## REFERENCES

1. Winsor, T., and G. E. Burch. 1944. Differential roles of layers of human epigastric skin on diffusion rate of water. *Arch. Intern. Med. (Chic.)* 74:428–436.
2. Berenson, G. S., and G. E. Burch. 1951. Studies of diffusion of water through dead human skin; the effect of different environmental states and of chemical alterations of the epidermis. *Am. J. Trop. Med. Hyg.* 31:842–853.
3. Onken, H. D., and C. A. Moyer. 1963. The water barrier in human epidermis. Physical and chemical nature. *Arch. Dermatol.* 87:584–590.
4. Brody, I. 1966. Interstitial space in normal human stratum corneum. *Nature.* 209:472–476.
5. Breathnach, A. S., T. Goodman, ..., M. Gross. 1973. Freeze-fracture replication of cells of stratum corneum of human epidermis. *J. Anat.* 114:65–81.
6. Elias, P. M., and D. S. Friend. 1975. The permeability barrier in mammalian epidermis. *J. Cell Biol.* 65:180–191.
7. Weerheim, A., and M. Ponc. 2001. Determination of stratum corneum lipid profile by tape stripping in combination with high-performance thin-layer chromatography. *Arch. Dermatol. Res.* 293:191–199.
8. Holleran, W. M., Y. Takagi, ..., P. M. Elias. 1993. Processing of epidermal glucosylceramides is required for optimal mammalian cutaneous permeability barrier function. *J. Clin. Invest.* 91:1656–1664.
9. Holleran, W. M., E. I. Ginns, ..., E. Sidransky. 1994. Consequences of  $\beta$ -glucocerebrosidase deficiency in epidermis. Ultrastructure and permeability barrier alterations in Gaucher disease. *J. Clin. Invest.* 93:1756–1764.

10. Iwai, I., H. Han, ..., L. Norlén. 2012. The human skin barrier is organized as stacked bilayers of fully extended ceramides with cholesterol molecules associated with the ceramide sphingoid moiety. *J. Invest. Dermatol.* 132:2215–2225.
11. Bouwstra, J. A., G. S. Gooris, ..., W. Bras. 1991. Structural investigations of human stratum corneum by small-angle x-ray scattering. *J. Invest. Dermatol.* 97:1005–1012.
12. Caspers, P. J., G. W. Lucassen, ..., G. J. Puppels. 2001. In vivo confocal Raman microspectroscopy of the skin: noninvasive determination of molecular concentration profiles. *J. Invest. Dermatol.* 116:434–442.
13. Das, C., M. G. Noro, and P. D. Olmsted. 2013. Lamellar and inverse micellar structures of skin lipids: effect of templating. *Phys. Rev. Lett.* 111:148101.
14. Marrink, S.-J., H. J. Risselada, ..., A. H. de Vries. 2007. The MARTINI force field: coarse grained model for biomolecular simulations. *J. Phys. Chem. B.* 111:7812–7824.
15. Marrink, S. J., A. H. de Vries, and A. E. Mark. 2004. Coarse grained model for semiquantitative lipid simulations. *J. Phys. Chem. B.* 108:750–760.
16. Marrink, S.-J., and D. P. Tieleman. 2002. Molecular dynamics simulation of spontaneous membrane fusion during a cubic-hexagonal phase transition. *Biophys. J.* 83:2386–2392.
17. Fuhrmans, M., V. Knecht, and S.-J. Marrink. 2009. A single bicontinuous cubic phase induced by fusion peptides. *J. Am. Chem. Soc.* 131:9166–9167.
18. Khelashvili, G., P. B. C. Alborno, ..., H. Weinstein. 2012. Why GPCRs behave differently in cubic and lamellar lipidic mesophases. *J. Am. Chem. Soc.* 134:15858–15868.
19. Kocherbitov, V. 2015. Molecular dynamics simulations of liquid crystalline phases of dodecyltrimethylammonium chloride. *J. Mol. Liq.* 210:74–81.
20. Marrink, S.-J., and D. P. Tieleman. 2001. Molecular dynamics simulation of a lipid diamond cubic phase. *J. Am. Chem. Soc.* 123:12383–12391.
21. Schwarz, H. A. 1890. *Gesammelte Mathematische Abhandlungen*. Springer, Berlin, Germany.
22. Lorensen, W. E., and H. E. Cline. 1987. Marching cubes: a high resolution 3D surface construction algorithm. *ACM SIGGRAPH Comput. Graph.* 21:163–169.
23. Schroeder, W., K. Martin, and B. Lorensen. 2006. *The Visualization Toolkit*, Fourth Edition. Kitware, Clifton Park, NY.
24. Masukawa, Y., H. Narita, ..., T. Kitahara. 2009. Comprehensive quantification of ceramide species in human stratum corneum. *J. Lipid Res.* 50:1708–1719.
25. Sovová, Ž., K. Berka, ..., P. Jurečka. 2015. Coarse-grain simulations of skin ceramide NS with newly derived parameters clarify structure of melted phase. *J. Phys. Chem. B.* 119:3988–3998.
26. López, C. A., Z. Sovová, ..., S. J. Marrink. 2013. Martini force field parameters for glycolipids. *J. Chem. Theory Comput.* 9:1694–1708.
27. de Jong, D. H., S. Baoukina, ..., S.-J. Marrink. 2016. Martini straight: boosting performance using a shorter cutoff and GPUs. *Comput. Phys. Commun.* 199:1–7.
28. Abraham, M. J., T. Murtola, ..., E. Lindahl. 2015. GROMACS: high performance molecular simulations through multi-level parallelism from laptops to supercomputers. *SoftwareX.* 1–2:19–25.
29. Pronk, S., S. Páll, ..., E. Lindahl. 2013. GROMACS 4.5: a high-throughput and highly parallel open source molecular simulation toolkit. *Bioinformatics.* 29:845–854.
30. Berendsen, H. J. C., J. P. M. Postma, ..., J. R. Haak. 1984. Molecular dynamics with coupling to an external bath. *J. Chem. Phys.* 81:3684–3690.
31. Bussi, G., D. Donadio, and M. Parrinello. 2007. Canonical sampling through velocity rescaling. *J. Chem. Phys.* 126:014101.
32. Parrinello, M., and A. Rahman. 1981. Polymorphic transitions in single crystals: a new molecular dynamics method. *J. Appl. Phys.* 52:7182–7190.
33. Humphrey, W., A. Dalke, and K. Schulten. 1996. VMD: visual molecular dynamics. *J. Mol. Graph.* 14:33–38, 27–28.
34. Stone, J. 1998. *An Efficient Library for Parallel Ray Tracing and Animation*. University of Missouri-Rolla, Rolla, MO.
35. Blender Foundation. 2015. *Blender 2.76* (Blender Institute, Amsterdam, the Netherlands).
36. Gowers, R. J., M. Linke, ..., O. Beckstein. 2016. MDAnalysis: A Python package for the rapid analysis of molecular dynamics simulations. In *Proceedings of the 15th Python in Science Conference*. S. Benthall and S. Rostrup, eds. SciPy, pp. 102–109.
37. Michaud-Agrawal, N., E. J. Denning, ..., O. Beckstein. 2011. MDAnalysis: a toolkit for the analysis of molecular dynamics simulations. *J. Comput. Chem.* 32:2319–2327.
38. Wassenaar, T. A., K. Pluhackova, ..., D. P. Tieleman. 2014. Going Backward: a flexible geometric approach to reverse transformation from coarse grained to atomistic models. *J. Chem. Theory Comput.* 10:676–690.
39. Rullgård, H., L.-G. Öfverstedt, ..., O. Öktem. 2011. Simulation of transmission electron microscope images of biological specimens. *J. Microsc.* 243:234–256.
40. Tang, T.-Y. D., N. J. Brooks, ..., R. H. Templer. 2015. Structural studies of the lamellar to bicontinuous gyroid cubic (Q(G)(II)) phase transitions under limited hydration conditions. *Soft Matter.* 11:1991–1997.
41. Gray, G. M., and H. J. Yardley. 1975. Lipid compositions of cells isolated from pig, human, and rat epidermis. *J. Lipid Res.* 16:434–440.
42. Gray, G. M., and H. J. Yardley. 1975. Different populations of pig epidermal cells: isolation and lipid composition. *J. Lipid Res.* 16:441–447.
43. Gray, G. M., and R. J. White. 1978. Glycosphingolipids and ceramides in human and pig epidermis. *J. Invest. Dermatol.* 70:336–341.
44. Wertz, P. W., D. T. Downing, ..., T. N. Traczyk. 1984. Sphingolipids of the stratum corneum and lamellar granules of fetal rat epidermis. *J. Invest. Dermatol.* 83:193–195.
45. Cox, P., and C. A. Squier. 1986. Variations in lipids in different layers of porcine epidermis. *J. Invest. Dermatol.* 87:741–744.

**Biophysical Journal, Volume 114**

**Supplemental Information**

**Structural Transitions in Ceramide Cubic Phases during Formation of  
the Human Skin Barrier**

**Christian L. Wennberg, Ali Narangifard, Magnus Lundborg, Lars Norlén, and Erik  
Lindahl**

# Structural transitions in ceramide cubic phases during formation of the human skin barrier

## Supporting information

Christian L. Wennberg<sup>1,2</sup>, Ali Narangifard<sup>2,3</sup>, Magnus Lundborg<sup>2</sup>, Lars Norlén<sup>3,4,#,\*</sup>, and Erik Lindahl<sup>1,5,#,\*</sup>

<sup>1</sup>Dept. Physics, Swedish e-Science Research Center, KTH Royal Institute of Technology, 100 44, Stockholm, Sweden

<sup>2</sup>ERCO Pharma AB, Science for Life Laboratory, Stockholm, Sweden

<sup>3</sup>Department of Cell and Molecular Biology (CMB), Karolinska Institutet, Box 285, 171 77 Stockholm, Sweden

<sup>4</sup>Dermatology Clinic, Karolinska University Hospital, 141 86 Stockholm, Sweden

<sup>5</sup>Dept. Biophysics & Biochemistry, Science for Life Laboratory, Stockholm University, Box 1031, 171 21 Solna, Sweden

#These authors contributed equally

\*Correspondence: [Lars.Norlen@ki.se](mailto:Lars.Norlen@ki.se) (L.N.), [erik.lindahl@gmail.com](mailto:erik.lindahl@gmail.com) (E.L.)

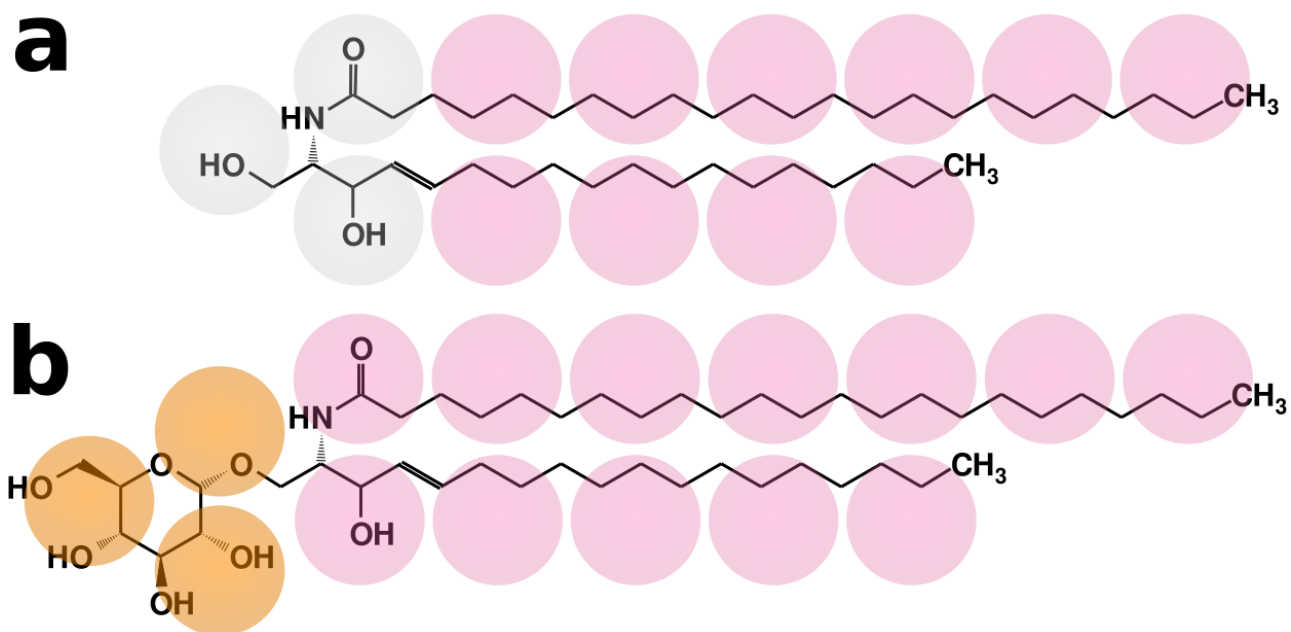

**Fig S1. Simulated molecules and coarse-grained representation.** The molecules simulated in this work are either ceramide NS (a) or glycosylceramide NS (b). The coarse-grained MARTINI force field utilized for the simulations uses a four-to-one mapping of heavy atoms. Most of the visualizations in this paper only display the headgroup-particles. The colors utilized in all images in the main article are as follows: The water structure is displayed in blue and yellow, the ceramide headgroup region in white, the glycosylceramide headgroup region in orange and the hydrocarbon tail regions in pink. The simulation box is outlined in blue.

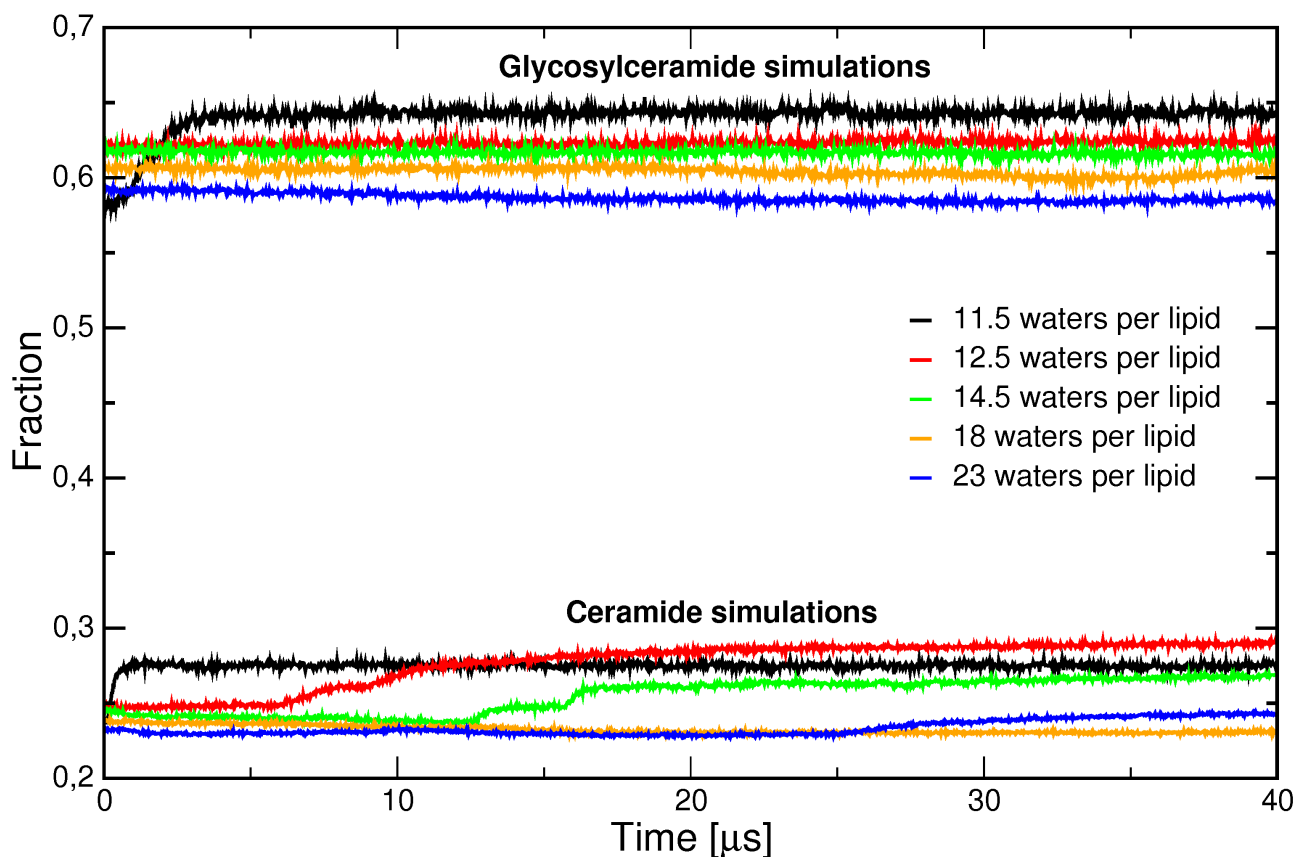

**Fig. S2. Inter-headgroup potential energy divided by inter-tail potential energy in the simulated systems, displayed as a per-molecule average over 40  $\mu$ s of simulation.**

The interaction between the hydrophobic tails is relatively similar between the simulated ceramide and glycosylceramide systems. There is a large discrepancy in the interaction strength between the headgroups, which gives a large difference when comparing the potential energy of the inter-headgroup interactions as a fraction of the corresponding potential energy inter-tails interaction.



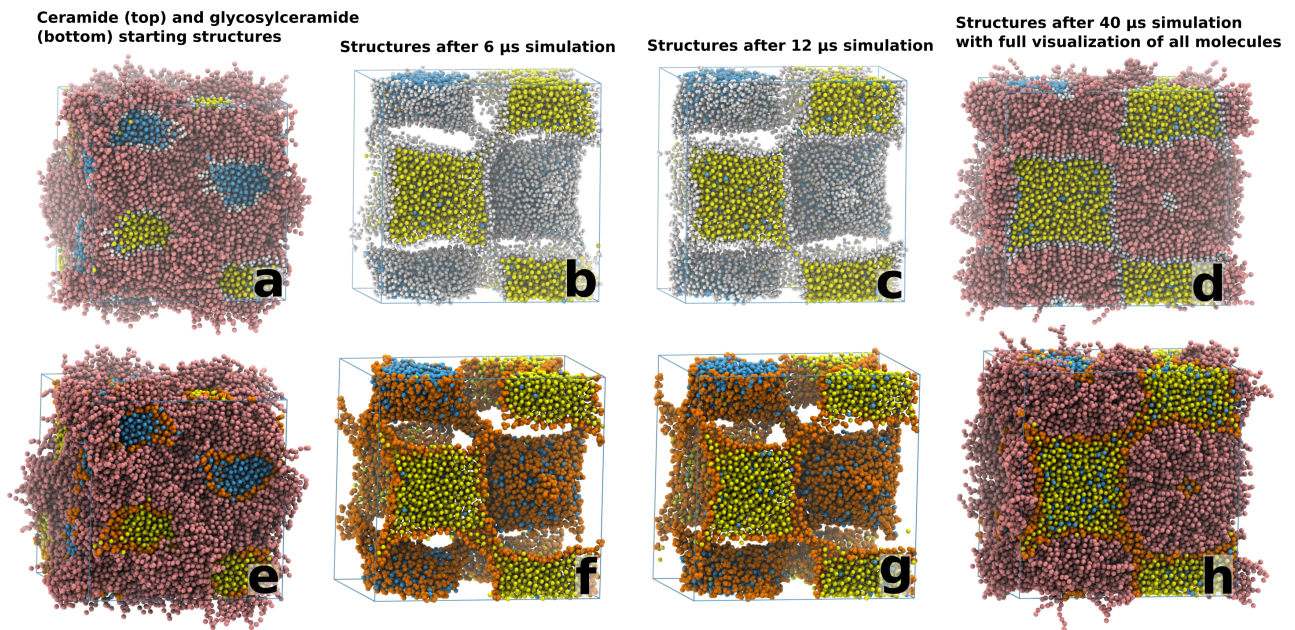

**Fig. S3. Snapshots of the cubic structures with a hydration of  $\sim 11.5$  waters per lipid after 0, 6, 12 and 40  $\mu\text{s}$  of simulation time.** In both the ceramide (a-d) and glycosylceramide (e-h) systems there is a structural rearrangement into a structure similar to an inverted micellar phase. The starting (a and e) and final structures (d and h) are displayed using a full representation of all simulation particles. The (originally) bicontinuous water structure is displayed in blue and yellow, the ceramide headgroup region in white, the glycosylceramide headgroup region in orange and the hydrocarbon tail regions in pink. The simulation box is outlined in blue.

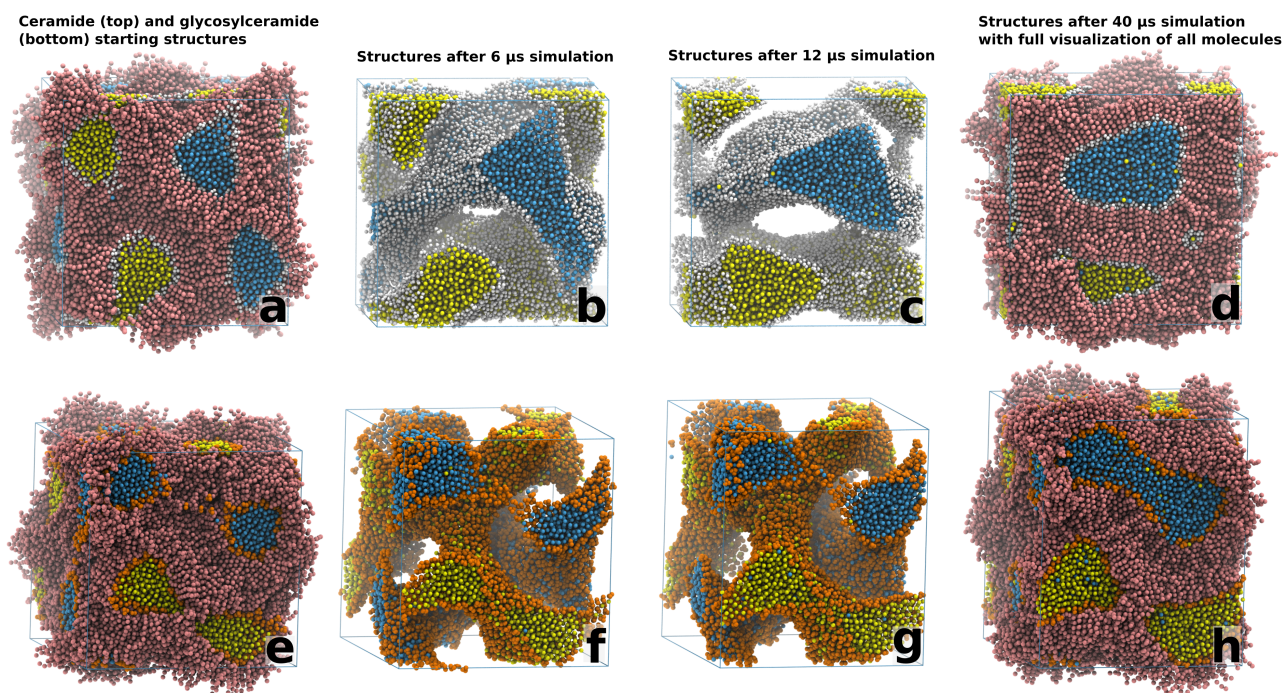

**Fig. S4. Snapshots of the cubic structures with a hydration of 12.5 waters per lipid after 0, 6, 12 and 40  $\mu$ s of simulation time.** In the ceramide (a-d) system there is a structural rearrangement towards a lamellar phase. In the glycosylceramide system (e-h) the gyroid geometry is maintained throughout the simulation. The starting (a and e) and final structures (d and h) are displayed using a full representation of all simulation particles. The bicontinuous water structure is displayed in blue and yellow, the ceramide headgroup region in white, the glycosylceramide headgroup region in orange and the hydrocarbon tail regions in pink. The simulation box is outlined in blue.

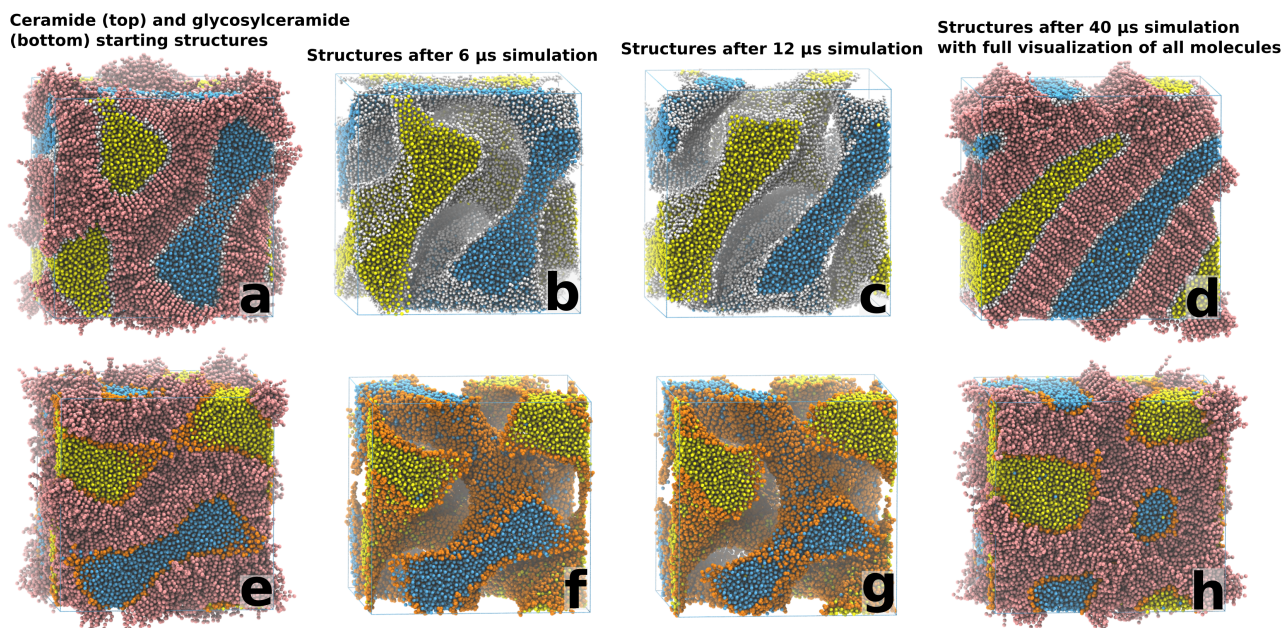

**Fig. S5. Snapshots of the cubic structures with a hydration of  $\sim 18$  waters per lipid after 0, 6, 12 and 40  $\mu\text{s}$  of simulation time.** In the ceramide (a-d) system there is a structural rearrangement towards a lamellar phase. In the glycosylceramide system (e-h) the gyroid geometry is maintained throughout the simulation. The starting (a and e) and final structures (d and h) are displayed using a full representation of all simulation particles. The bicontinuous water structure is displayed in blue and yellow, the ceramide headgroup region in white, the glycosylceramide headgroup region in orange and the hydrocarbon tail regions in pink. The simulation box is outlined in blue.

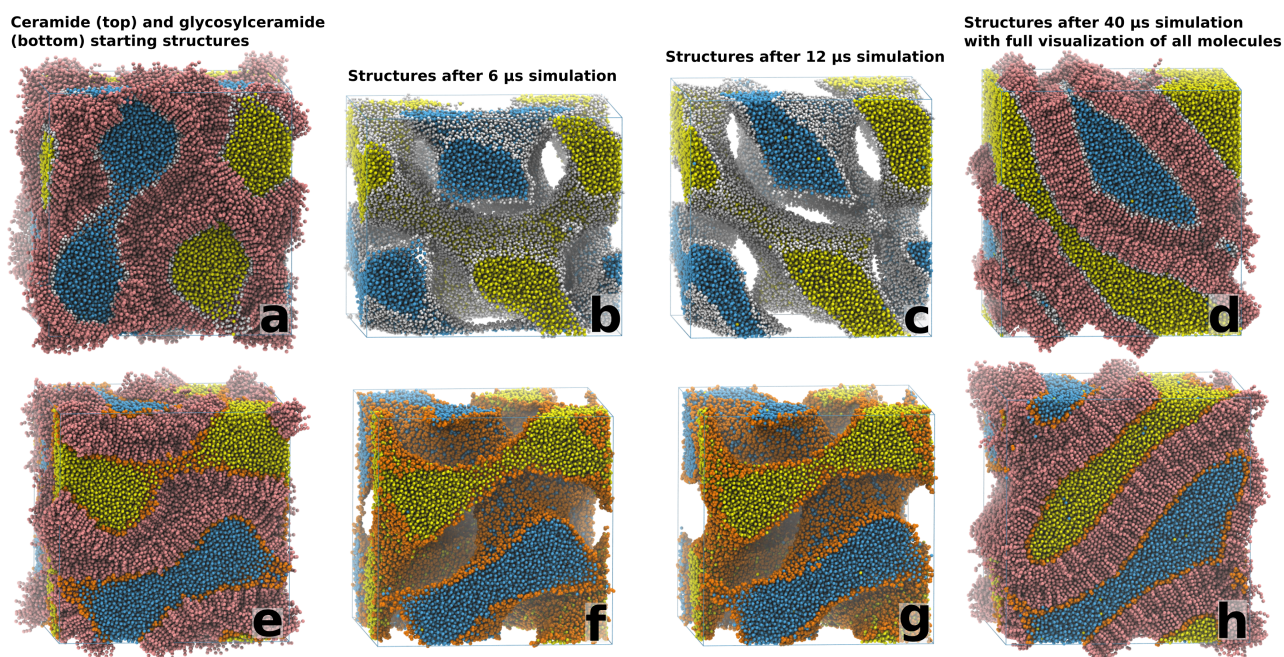

**Fig. S6. Snapshots of the cubic structures with a hydration of  $\sim 23$  waters per lipid after 0, 6, 12 and 40  $\mu$ s of simulation time.** In both the ceramide (a-d) and glycosylceramide (e-h) system there is a structural rearrangement towards a lamellar phase. The starting (a and e) and final structures (d and h) are displayed using a full representation of all simulation particles. The bicontinuous water structure is displayed in blue and yellow, the ceramide headgroup region in white, the glycosylceramide headgroup region in orange and the hydrocarbon tail regions in pink. The simulation box is outlined in blue.

Glycosylceramide system at 100% hydration

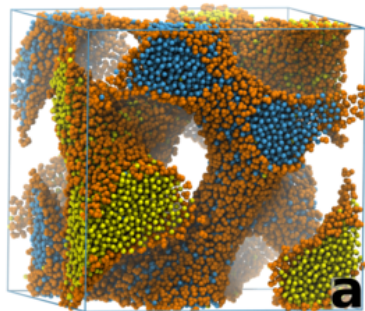

Glycosylceramide system at 70% hydration

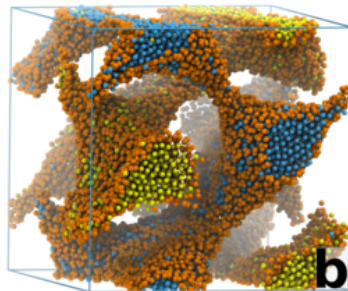

Glycosylceramide system at 40% hydration

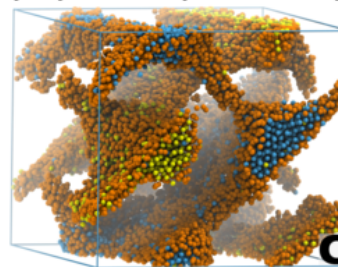

Glycosylceramide system at 20% hydration

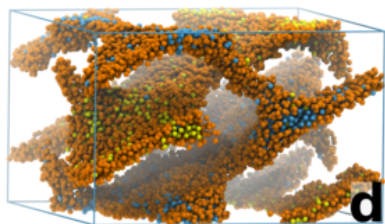

Glycosylceramide system at 0% hydration

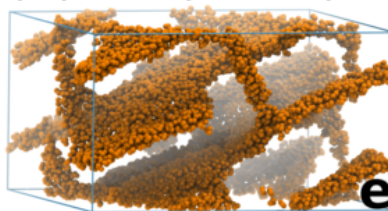

Glycosylceramide system at 0% hydration, with full visualization of hydrocarbon chains

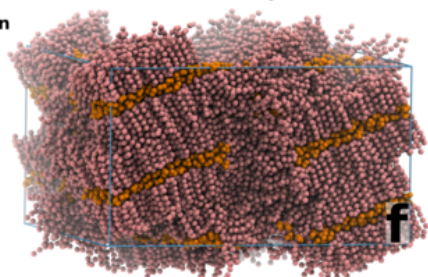

**Fig. S7. The final structures of the glycosylceramide system in Fig. 2 at a water content (compared to the original system) of 100, 70, 40, 20 and 0 % (a-f).** The gyroid organisation of the glycosylceramide structure is maintained as water is removed from the system. Although the final system contain areas with lamellar structures (as seen in e-f), the overall structure still resembles the bi-continuous gyroid geometry of the original system (a). Water is shown in blue and yellow, glycosylceramide headgroups region in orange and glycosylceramide hydrocarbon tails in pink. The simulation box is outlined in blue.

Ceramide (top) and glycosylceramide (bottom) structures at 70% hydration

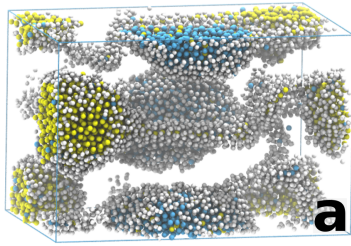

Structures at 40% hydration

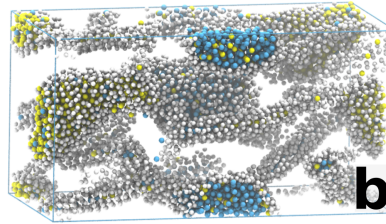

Structures at 0% hydration

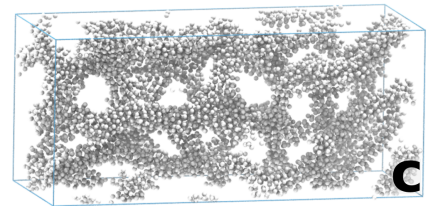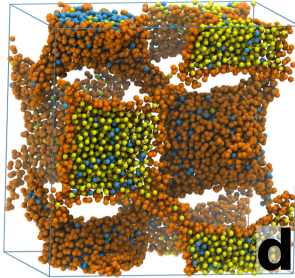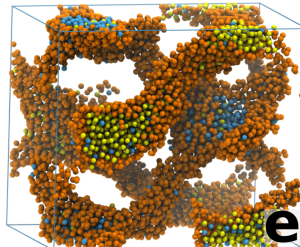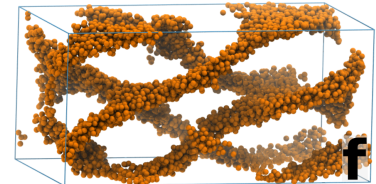

**Fig. S8.** The final structures of the systems with a hydration of  $\sim 11.5$  waters per lipid at a water content (compared to the original system) of 70, 40 and 0 %. The ceramide system (a-c) undergoes a transition to a structure resembling a disorganized lipid mixture as water is removed. Comparatively the glycosylceramide system (d-f) maintains the structure present from the original simulation, and at the end the dehydrated structure is similar to those observed at other hydration levels. Water is shown in blue and yellow, the ceramide headgroup region in white, the glycosylceramide headgroup region in orange and the hydrocarbon tail regions in pink. The simulation box is outlined in blue.

Ceramide (top) and glycosylceramide (bottom) structures at 70% hydration

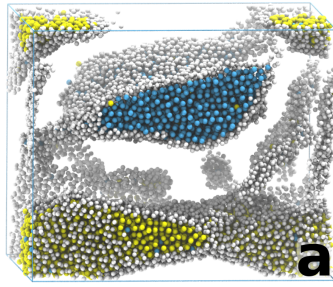

Structures at 40% hydration

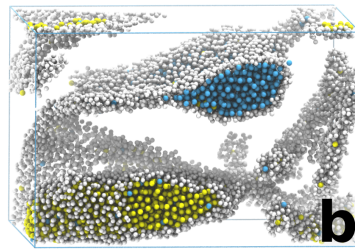

Structures at 0% hydration

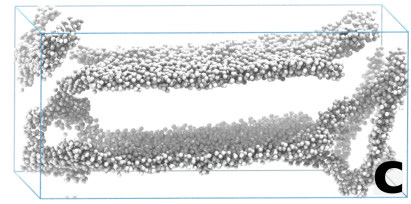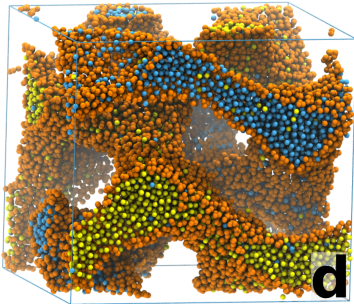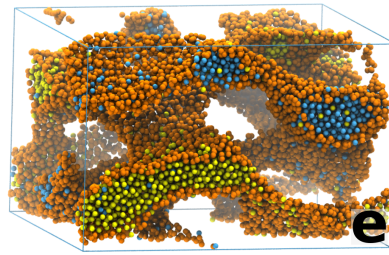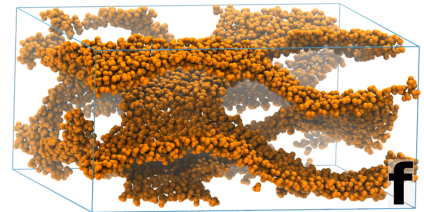

**Fig. S9.** The final structures of the systems with a hydration of 12.5 waters per lipid at a water content (compared to the original system) of 70, 40 and 0 %. The ceramide system (a-c) transforms into a stacked lamellar system as water is reduced, although some irregularities still exist at the end of the last dehydration step. The gyroid organisation of the glycosylceramide structure (d-f) is maintained as water is removed from the system. Water is shown in blue and yellow, the ceramide headgroup region in white, the glycosylceramide headgroup region in orange and the hydrocarbon tail regions in pink. The simulation box is outlined in blue.

Ceramide (top) and glycosylceramide (bottom) structures at 70% hydration

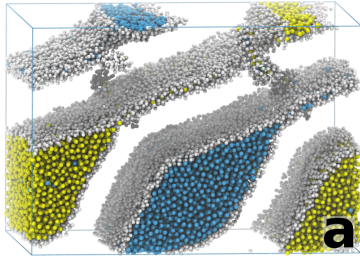

Structures at 40% hydration

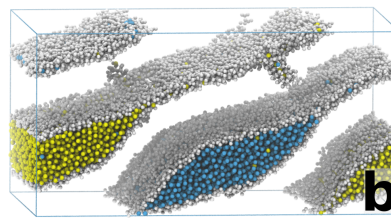

Structures at 0% hydration

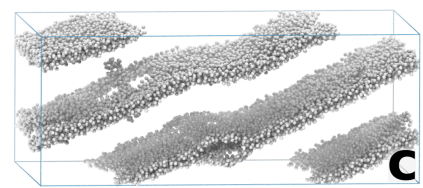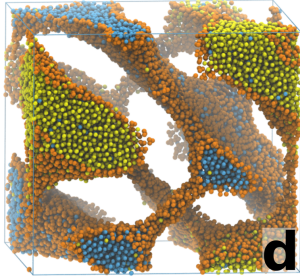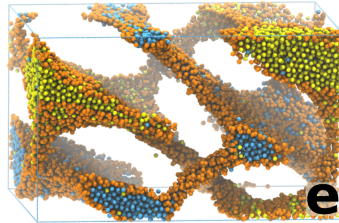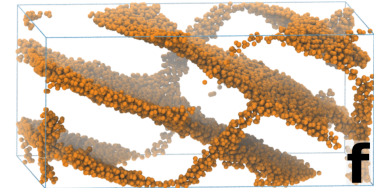

**Fig. S10.** The final structures of the systems with a hydration of  $\sim 18$  waters per lipid at a water content (compared to the original system) of 70, 40 and 0 %. The ceramide system (a-c) transforms into a stacked lamellar system as water is reduced. The gyroid organisation of the glycosylceramide structure (d-f) is maintained as water is removed from the system. Although the final system contains areas with lamellar structures (similar to Fig. S7), the overall structure still resembles the bi-continuous gyroid geometry of the original system. Water is shown in blue and yellow, the ceramide headgroup region in white, the glycosylceramide headgroup region in orange and the hydrocarbon tail regions in pink. The simulation box is outlined in blue.



Ceramide (top) and glycosylceramide (bottom) structures at 70% hydration

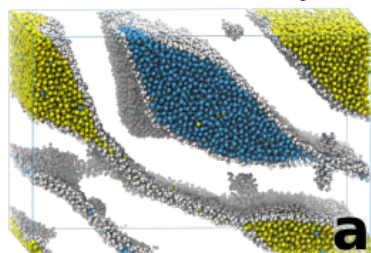

Structures at 40% hydration

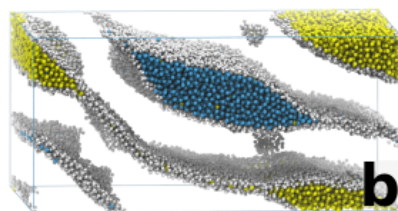

Structures at 0% hydration

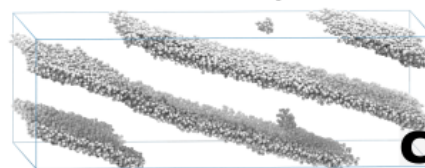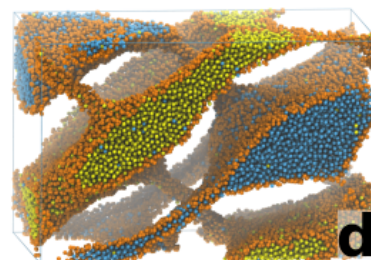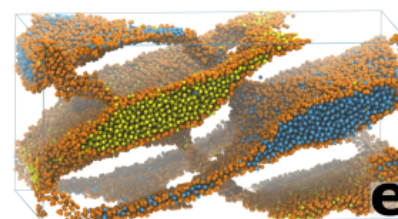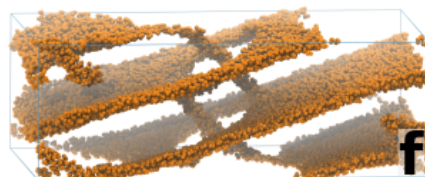

**Fig. S11.** The final structures of the systems with a hydration of  $\sim 23$  waters per lipid at a water content (compared to the original system) of 70, 40 and 0 %. Both the ceramide system (a-c) and glycosylceramide system (d-f) transforms into a stacked lamellar system as water is reduced. Although, the glycosylceramide structure still maintains remnants of the gyroid structure present in the original system at the end, similar to Fig. S10f. Water is shown in blue and yellow, the ceramide headgroup region in white, the glycosylceramide headgroup region in orange and the hydrocarbon tail regions in pink. The simulation box is outlined in blue.





**Ceramide system at 70% hydration**

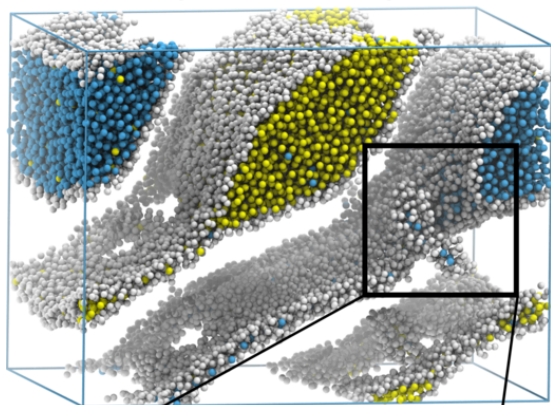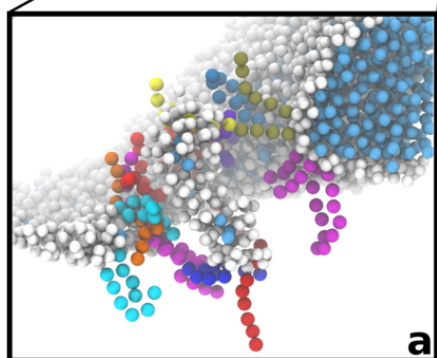

**Disorganized ceramide region, the visualized ceramide molecules are colored individually**

**Ceramide system at 0% hydration**

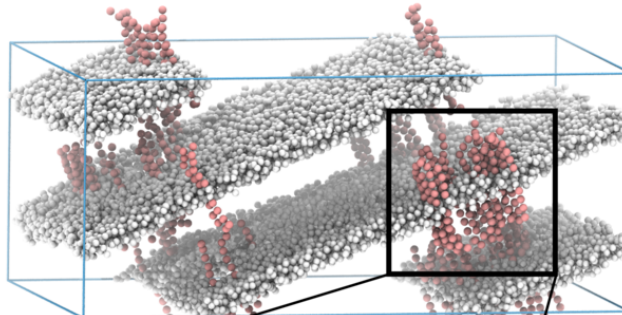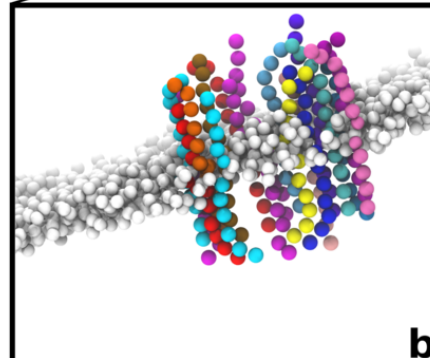

**Extended splayed chain ceramides, the visualized ceramide molecules are colored individually**

**Fig S14. Disorganized regions in the ceramide structure with an original hydration of  $\sim 14.5$  waters per lipid result in extended splayed chain ceramides.** During the cubic- to lamellar transition in the ceramide system shown in Fig. 4f-4h, ceramide-molecules present in the disordered regions (a) eventually relaxed into an extended splayed chain conformation in the final lamellar bilayer structure (b). Water is shown in blue and yellow, ceramide headgroups region in white and ceramide hydrocarbon tails in pink. Ceramides in the insets a and b are colored individually in order to display the transition from an disorganized hairpin conformation (a) into the organized extended splayed chain conformation (b). The simulation box is outlined in blue.

**Table S1. Water diffusion coefficients calculated during the first or last 4  $\mu$ s of simulation in all simulated systems.**

| <b>System<br/>(Molecule, box side length)</b> | <b>Diffusion first 4 <math>\mu</math>s (<math>\text{cm}^2/\text{s}</math>)</b> | <b>Diffusion last 4 <math>\mu</math>s (<math>\text{cm}^2/\text{s}</math>)</b> |
|-----------------------------------------------|--------------------------------------------------------------------------------|-------------------------------------------------------------------------------|
| Ceramide, 15 nm                               | $0.0158 \pm 0.0082$                                                            | $0.0117 \pm 0.0012$                                                           |
| Ceramide, 17.5 nm                             | $0.2586 \pm 0.0027$                                                            | $0.2365 \pm 0.0070$                                                           |
| Ceramide, 20 nm                               | $0.3193 \pm 0.0043$                                                            | $0.2424 \pm 0.0002$                                                           |
| Ceramide 22.5 nm                              | $0.3850 \pm 0.0030$                                                            | $0.3563 \pm 0.0082$                                                           |
| Ceramide 25 nm                                | $0.4393 \pm 0.0058$                                                            | $0.2973 \pm 0.0082$                                                           |
| Glycosylceramide, 15 nm                       | $0.0318 \pm 0.0136$                                                            | $0.0041 \pm 0.0003$                                                           |
| Glycosylceramide, 17.5 nm                     | $0.1919 \pm 0.0009$                                                            | $0.1756 \pm 0.0005$                                                           |
| Glycosylceramide, 20 nm                       | $0.2486 \pm 0.0005$                                                            | $0.2342 \pm 0.0013$                                                           |
| Glycosylceramide, 22.5 nm                     | $0.2920 \pm 0.0020$                                                            | $0.1776 \pm 0.0062$                                                           |
| Glycosylceramide, 25 nm                       | $0.3903 \pm 0.0013$                                                            | $0.3497 \pm 0.0025$                                                           |
